# Supplementary material
Source: PubMed Central journal article supplement (PMC6622178)
Supplement: NIHMS1526830-supplement-3.pdf [file NIHMS1526830-supplement-3.pdf]

CLUSTAL O(1.2.1) multiple sequence alignment

|                      |                                                              |     |
|----------------------|--------------------------------------------------------------|-----|
| DRB5*02:02e1_STR1    | CGGGGAGGGGGTCCCAAAGCCTTGGGATCAGAAGGGGTTTCCCGCTGGTCCCCAGA     | 60  |
| DRB5*02:02e1         | CGGGGAGGGGGTCCCAAAGCCTTGGGATCAGAAGGGGTTTCCCGCTGGTCCCCAGA     | 60  |
| DRB5*02:03e1         | ****AGGGGGTCCCAAAGCCTTGGGATCAGAAGGGGTTTCCCGCTGGTCCCCAGA      | 55  |
| DRB5*01:01:01_HGP    | CGGGGAGGGGGTCCCAAAGCCTTGGGATCAGAAGGGGTTTCCCTGCCTGGTCCCCAGA   | 60  |
| DRB5*01:01:01_STR1   | CGGGGAGGGGGTCCCAAAGCCTTGGGATCAGAAGGGGTTTCCCTGCCTGGTCCCCAGA   | 60  |
| DRB5*01:01:01v1      | *****GGGGGTCCCAAAGCCTTGGGATCAGAAGGGGTTTCCCTGCCTGGTCCCCAGA    | 54  |
| DRB5*01:01:01v1_STR1 | CGGGGAGGGGGTCCCAAAGCCTTGGGATCAGAAGGGGTTTCCCTGCCTGGTCCCCAGA   | 60  |
| DRB5*01:08Ne1        | *****GGGGGTCCCAAAGCCTTGGGATCAGAAGGGGTTTCCCTGCCTGGTCCCCAGA    | 54  |
| DRB5*01:03e1         | *****GGGGGTCCCAAAGCCTTGGGATCAGAAGGGGTTTCCCTGCCTGGTCCCCAGA    | 54  |
| DRB5*01:02e1         | CGGGGAGGGGGTCCCAAAGCCTTGGGATCAGAAGGGGTTTCCCTGCCTGGTCCCCAGA   | 60  |
| DRB5*01:02e1_STR1    | *****GGGGGTCCCAAAGCCTTGGGATCAGAAGGGGTTTCCCTGCCTGGTCCCCAGA    | 54  |
| -----                |                                                              |     |
| DRB5*02:02e1_STR1    | CAGCCCGTTCGCCTCAGGAAGACGGAGGATGAGCCTCTGGGCTGCGCGTGGTCGGGGTTA | 120 |
| DRB5*02:02e1         | CAGCCCGTTCGCCTCAGGAAGACGGAGGATGAGCCTCTGGGCTGCGCGTGGTCGGGGTTA | 120 |
| DRB5*02:03e1         | CAGCCCGTTCGCCTCAGGAAGACGGAGGATGAGCCTCTGGGCTGCGCGTGGTCGGGGTTA | 115 |
| DRB5*01:01:01_HGP    | CACCCCGTTCGCCTCAGGAAGACGGAGGATGAGCCTCTGGGCTGCGCGTGGTCGGGGTTA | 120 |
| DRB5*01:01:01_STR1   | CACCCCGTTCGCCTCAGGAAGACGGAGGATGAGCCTCTGGGCTGCGCGTGGTCGGGGTTA | 120 |
| DRB5*01:01:01v1      | CACCCCGTTCGCCTCAGGAAGACGGAGGATGAGCCTCTGGGCTGCGCGTGGTCGGGGTTA | 114 |
| DRB5*01:01:01v1_STR1 | CACCCCGTTCGCCTCAGGAAGACGGAGGATGAGCCTCTGGGCTGCGCGTGGTCGGGGTTA | 120 |
| DRB5*01:08Ne1        | CACCCCGTTCGCCTCAGGAAGACGGAGGATGAGCCTCTGGGCTGCGCGTGGTCGGGGTTA | 114 |
| DRB5*01:03e1         | CACCCCGTTCGCCTCAGGAAGACGGAGGATGAGCCTCTGGGCTGCGCGTGGTCGGGGTTA | 114 |
| DRB5*01:02e1         | CACCCCGTTCGCCTCAGGAAGACGGAGGATGAGCCTCTGGGCTGCGCGTGGTCGGGGTTA | 120 |
| DRB5*01:02e1_STR1    | CACCCCGTTCGCCTCAGGAAGACGGAGGATGAGCCTCTGGGCTGCGCGTGGTCGGGGTTA | 114 |
| -----                |                                                              |     |
| DRB5*02:02e1_STR1    | TGGTTGGGATCAGTTAAGGTTCCAGTGCCCGCACCCCGCCAGGGAGCCCCGGATGGCGG  | 180 |
| DRB5*02:02e1         | TGGTTGGGATCAGTTAAGGTTCCAGTGCCCGCACCCCGCCAGGGAGCCCCGGATGGCGG  | 180 |
| DRB5*02:03e1         | TGGTTGGGATCAGTTAAGGTTCCAGTGCCCGCACCCCGCCAGGGAGCCCCGGATGGCGG  | 175 |
| DRB5*01:01:01_HGP    | TGGTTGGGATCAGTTAAGGTTCCAGTGCCCGCACCCCGCCAGGGAGCCCCGGATGGCGG  | 180 |
| DRB5*01:01:01_STR1   | TGGTTGGGATCAGTTAAGGTTCCAGTGCCCGCACCCCGCCAGGGAGCCCCGGATGGCGG  | 180 |
| DRB5*01:01:01v1      | TGGTTGGGATCAGTTAAGGTTCCAGTGCCCGCACCCCGCCAGGGAGCCCCGGATGGCGG  | 174 |
| DRB5*01:01:01v1_STR1 | TGGTTGGGATCAGTTAAGGTTCCAGTGCCCGCACCCCGCCAGGGAGCCCCGGATGGCGG  | 180 |
| DRB5*01:08Ne1        | TGGTTGGGATCAGTTAAGGTTCCAGTGCCCGCACCCCGCCAGGGAGCCCCGGATGGCGG  | 174 |
| DRB5*01:03e1         | TGGTTGGGATCAGTTAAGGTTCCAGTGCCCGCACCCCGCCAGGGAGCCCCGGATGGCGG  | 174 |
| DRB5*01:02e1         | TGGTTGGGATCAGTTAAGGTTCCAGTGCCCGCACCCCGCCAGGGAGCCCCGGATGGCGG  | 180 |
| DRB5*01:02e1_STR1    | TGGTTGGGATCAGTTAAGGTTCCAGTGCCCGCACCCCGCCAGGGAGCCCCGGATGGCGG  | 174 |
| -----                |                                                              |     |
| DRB5*02:02e1_STR1    | CGTCTCTGTCAAGTGTCTTCCCGGAGGCGCCCTGTGACCGGATCCTTCGTGTCCCCAC   | 240 |
| DRB5*02:02e1         | CGTCTCTGTCAAGTGTCTTCCCGGAGGCGCCCTGTGACCGGATCCTTCGTGTCCCCAC   | 240 |
| DRB5*02:03e1         | CGTCTCTGTCAAGTGTCTTCCCGGAGGCGCCCTGTGACCGGATCCTTCGTGTCCCCAC   | 235 |
| DRB5*01:01:01_HGP    | CGTCTCTGTCAAGTGTCTTCCCGGAGGCGCCCTGTGACCGGATCCTTCGTGTCCCCAC   | 240 |
| DRB5*01:01:01_STR1   | CGTCTCTGTCAAGTGTCTTCCCGGAGGCGCCCTGTGACCGGATCCTTCGTGTCCCCAC   | 240 |
| DRB5*01:01:01v1      | CGTCTCTGTCAAGTGTCTTCCCGGAGGCGCCCTGTGACCGGATCCTTCGTGTCCCCAC   | 234 |
| DRB5*01:01:01v1_STR1 | CGTCTCTGTCAAGTGTCTTCCCGGAGGCGCCCTGTGACCGGATCCTTCGTGTCCCCAC   | 240 |
| DRB5*01:08Ne1        | CGTCTCTGTCAAGTGTCTTCCCGGAGGCGCCCTGTGACCGGATCCTTCGTGTCCCCAC   | 234 |
| DRB5*01:03e1         | CGTCTCTGTCAAGTGTCTTCCCGGAGGCGCCCTGTGACCGGATCCTTCGTGTCCCCAC   | 234 |
| DRB5*01:02e1         | CGTCTCTGTCAAGTGTCTTCCCGGAGGCGCCCTGTGACCGGATCCTTCGTGTCCCCAC   | 240 |
| DRB5*01:02e1_STR1    | CGTCTCTGTCAAGTGTCTTCCCGGAGGCGCCCTGTGACCGGATCCTTCGTGTCCCCAC   | 234 |
| -----                |                                                              |     |
| DRB5*02:02e1_STR1    | AG CATGTTTCTTGACAGGAGGATAGATGAGTGTGATTTCTTCAACGGGACGGAGCGGGT | 300 |
| DRB5*02:02e1         | AG CATGTTTCTTGACAGGAGGATAGATGAGTGTGATTTCTTCAACGGGACGGAGCGGGT | 300 |
| DRB5*02:03e1         | AG CATGTTTCTTGACAGGAGGATAGATGAGTGTGATTTCTTCAACGGGACGGAGCGGGT | 295 |
| DRB5*01:01:01_HGP    | AG CACGTTTCTTGACAGGAGGATAGATGAGTGTGATTTCTTCAACGGGACGGAGCGGGT | 300 |
| DRB5*01:01:01_STR1   | AG CACGTTTCTTGACAGGAGGATAGATGAGTGTGATTTCTTCAACGGGACGGAGCGGGT | 300 |
| DRB5*01:01:01v1      | AG CACGTTTCTTGACAGGAGGATAGATGAGTGTGATTTCTTCAACGGGACGGAGCGGGT | 294 |
| DRB5*01:01:01v1_STR1 | AG CACGTTTCTTGACAGGAGGATAGATGAGTGTGATTTCTTCAACGGGACGGAGCGGGT | 300 |
| DRB5*01:08Ne1        | AG CACGTTTCTTGACAGGAGGATAGATGAGTGTGATTTCTTCAACGGGACGGAGCGGGT | 294 |
| DRB5*01:03e1         | AG CACGTTTCTTGACAGGAGGATAGATGAGTGTGATTTCTTCAACGGGACGGAGCGGGT | 294 |
| DRB5*01:02e1         | AG CACGTTTCTTGACAGGAGGATAGATGAGTGTGATTTCTTCAACGGGACGGAGCGGGT | 300 |
| DRB5*01:02e1_STR1    | AG CACGTTTCTTGACAGGAGGATAGATGAGTGTGATTTCTTCAACGGGACGGAGCGGGT | 294 |
| -- -----             |                                                              |     |
| DRB5*02:02e1_STR1    | GCGGTTCCGACAGAGGACATCTATAACCAAGAGGAGAACTGCGCTTCGACAGCGACGT   | 360 |
| DRB5*02:02e1         | GCGGTTCCGACAGAGGACATCTATAACCAAGAGGAGAACTGCGCTTCGACAGCGACGT   | 360 |
| DRB5*02:03e1         | GCGGTTCCGACAGAGGACATCTATAACCAAGAGGAGAACTGCGCTTCGACAGCGACGT   | 355 |
| DRB5*01:01:01_HGP    | GCGGTTCCGACAGAGGACATCTATAACCAAGAGGAGAACTGCGCTTCGACAGCGACGT   | 360 |
| DRB5*01:01:01_STR1   | GCGGTTCCGACAGAGGACATCTATAACCAAGAGGAGAACTGCGCTTCGACAGCGACGT   | 360 |
| DRB5*01:01:01v1      | GCGGTTCCGACAGAGGACATCTATAACCAAGAGGAGAACTGCGCTTCGACAGCGACGT   | 354 |
| DRB5*01:01:01v1_STR1 | GCGGTTCCGACAGAGGACATCTATAACCAAGAGGAGAACTGCGCTTCGACAGCGACGT   | 360 |
| DRB5*01:08Ne1        | GCGGTTCCGACAGAGGACATCTATAACCAAGAGGAGAACTGCGCTTCGACAGCGACGT   | 354 |
| DRB5*01:03e1         | GCGGTTCCGACAGAGGACATCTATAACCAAGAGGAGAACTGCGCTTCGACAGCGACGT   | 354 |
| DRB5*01:02e1         | GCGGTTCCGACAGAGGACATCTATAACCAAGAGGAGAACTGCGCTTCGACAGCGACGT   | 360 |
| DRB5*01:02e1_STR1    | GCGGTTCCGACAGAGGACATCTATAACCAAGAGGAGAACTGCGCTTCGACAGCGACGT   | 354 |
| -----                |                                                              |     |
| DRB5*02:02e1_STR1    | GGGGGAGTACCGGGCGGTGACGGAGCTGGGGCGGCTGACGCTGAGTACTGGAACAGCCA  | 420 |
| DRB5*02:02e1         | GGGGGAGTACCGGGCGGTGACGGAGCTGGGGCGGCTGACGCTGAGTACTGGAACAGCCA  | 420 |
| DRB5*02:03e1         | GGGGGAGTACCGGGCGGTGACGGAGCTGGGGCGGCTGACGCTGAGTACTGGAACAGCCA  | 415 |
| DRB5*01:01:01_HGP    | GGGGGAGTACCGGGCGGTGACGGAGCTGGGGCGGCTGACGCTGAGTACTGGAACAGCCA  | 420 |
| DRB5*01:01:01_STR1   | GGGGGAGTACCGGGCGGTGACGGAGCTGGGGCGGCTGACGCTGAGTACTGGAACAGCCA  | 420 |
| DRB5*01:01:01v1      | GGGGGAGTACCGGGCGGTGACGGAGCTGGGGCGGCTGACGCTGAGTACTGGAACAGCCA  | 414 |
| DRB5*01:01:01v1_STR1 | GGGGGAGTACCGGGCGGTGACGGAGCTGGGGCGGCTGACGCTGAGTACTGGAACAGCCA  | 420 |
| DRB5*01:08Ne1        | GGGGGAGTACCGGGCGGTGACGGAGCTGGGGCGGCTGACGCTGAGTACTGGAACAGCCA  | 414 |



|                      |                                                                |      |
|----------------------|----------------------------------------------------------------|------|
| DRB5*01:01:01v1_STR1 | GGAAAGCAGGAGGGGGCTTCTTCTTATCCTTGGAGGCCCTCTGTGGGGAGGTGACATGGGAG | 808  |
| DRB5*01:08Ne1        | GGAAAGCAGGAGGGGGCTTCTTCTTATCCTTGGAGGCCCTCTGTGGGGAGGTGACATGGGAG | 832  |
| DRB5*01:03e1         | GGAAAGCAGGAGGGGGCTTCTTCTTATCCTTGGAGGCCCTCTGTGGGGAGGTGACATGGGAG | 834  |
| DRB5*01:02e1         | GGAAAGCAGGAGGGGGCTTCTTCTTATCCTTGGAGGCCCTCTGTGGGGAGGTGACATGGGAG | 840  |
| DRB5*01:02e1_STR1    | GGAAAGCAGGAGGGGGCTTCTTCTTATCCTTGGAGGCCCTCTGTGGGGAGGTGACATGGGAG | 834  |
| -----                |                                                                |      |
| DRB5*02:02e1_STR1    | GTGGGTGCAGGGGGCTGGAGAGAGAGGAGACCTTGGTTGTCTCGTGTCCCTTAGAGATGCA  | 860  |
| DRB5*02:02e1         | GTGGGTGCAGGGGGCTGGAGAGAGAGGAGACCTTGGTTGTCTCGTGTCCCTTAGAGATGCA  | 864  |
| DRB5*02:03e1         | GTGGGTGCAGGGGGCTGGAGAGAGAGGAGACCTTGGTTGTCTCGTGTCCCTTAGAGATGCA  | 859  |
| DRB5*01:01:01_HGP    | GTGGGTGCAGGGGGCTGGAGAGAGAGGAGACCTTGGTTGTCTCGTGTCCCTTAGAGATGCA  | 864  |
| DRB5*01:01:01_STR1   | GTGGGTGCAGGGGGCTGGAGAGAGAGGAGACCTTGGTTGTCTCGTGTCCCTTAGAGATGCA  | 860  |
| DRB5*01:01:01v1      | GTGGGTGCAGGGGGCTGGAGAGAGAGGAGACCTTGGTTGTCTCGTGTCCCTTAGAGATGCA  | 858  |
| DRB5*01:01:01v1_STR1 | GTGGGTGCAGGGGGCTGGAGAGAGAGGAGACCTTGGTTGTCTCGTGTCCCTTAGAGATGCA  | 868  |
| DRB5*01:08Ne1        | GTGGGTGCAGGGGGCTGGAGAGAGAGGAGACCTTGGTTGTCTCGTGTCCCTTAGAGATGCA  | 892  |
| DRB5*01:03e1         | GTGGGTGCAGGGGGCTGGAGAGAGAGGAGACCTTGGTTGTCTCGTGTCCCTTAGAGATGCA  | 894  |
| DRB5*01:02e1         | GTGGGTGCAGGGGGCTGGAGAGAGAGGAGACCTTGGTTGTCTCGTGTCCCTTAGAGATGCA  | 900  |
| DRB5*01:02e1_STR1    | GTGGGTGCAGGGGGCTGGAGAGAGAGGAGACCTTGGTTGTCTCGTGTCCCTTAGAGATGCA  | 894  |
| -----                |                                                                |      |
| DRB5*02:02e1_STR1    | GGGAAGGAAAAGTGTAAAGTGTGTGTGGTTGGGGTGAAGGTTTAGGGGAGGAGAGCTGAGG  | 920  |
| DRB5*02:02e1         | GGGAAGGAAAAGTGTAAAGTGTGTGTGGTTGGGGTGAAGGTTTAGGGGAGGAGAGCTGAGG  | 924  |
| DRB5*02:03e1         | GGGAAGGAAAAGTGTAAAGTGTGTGTGGTTGGGGTGAAGGTTTAGGGGAGGAGAGCTGAGG  | 919  |
| DRB5*01:01:01_HGP    | GGGAAGGAAAAGTGTAAAGTGTGTGTGGTTGGGGTGAAGGTTTAGGGGAGGAGAGCTGAGG  | 924  |
| DRB5*01:01:01_STR1   | GGGAAGGAAAAGTGTAAAGTGTGTGTGGTTGGGGTGAAGGTTTAGGGGAGGAGAGCTGAGG  | 920  |
| DRB5*01:01:01v1      | GGGAAGGAAAAGTGTAAAGTGTGTGTGGTTGGGGTGAAGGTTTAGGGGAGGAGAGCTGAGG  | 918  |
| DRB5*01:01:01v1_STR1 | GGGAAGGAAAAGTGTAAAGTGTGTGTGGTTGGGGTGAAGGTTTAGGGGAGGAGAGCTGAGG  | 928  |
| DRB5*01:08Ne1        | GGGAAGGAAAAGTGTAAAGTGTGTGTGGTTGGGGTGAAGGTTTAGGGGAGGAGAGCTGAGG  | 952  |
| DRB5*01:03e1         | GGGAAGGAAAAGTGTAAAGTGTGTGTGGTTGGGGTGAAGGTTTAGGGGAGGAGAGCTGAGG  | 954  |
| DRB5*01:02e1         | GGGAAGGAAAAGTGTAAAGTGTGTGTGGTTGGGGTGAAGGTTTAGGGGAGGAGAGCTGAGG  | 960  |
| DRB5*01:02e1_STR1    | GGGAAGGAAAAGTGTAAAGTGTGTGTGGTTGGGGTGAAGGTTTAGGGGAGGAGAGCTGAGG  | 954  |
| -----                |                                                                |      |
| DRB5*02:02e1_STR1    | GGTGTGGAAGATTTGTGATAATATGAGGAGGCCAGTTCAGACTGTCCCTGGCACCACC     | 980  |
| DRB5*02:02e1         | GGTGTGGAAGATTTGTGATAATATGAGGAGGCCAGTTCAGACTGTCCCTGGCACCACC     | 984  |
| DRB5*02:03e1         | GGTGTGGAAGATTTGTGATAATATGAGGAGGCCAGTTCAGACTGTCCCTGGCACCACC     | 979  |
| DRB5*01:01:01_HGP    | GGTGTGGAAGATTTGTGATAATATGAGGAGGCCAGTTCAGACTGTCCCTGGCACCACC     | 984  |
| DRB5*01:01:01_STR1   | GGTGTGGAAGATTTGTGATAATATGAGGAGGCCAGTTCAGACTGTCCCTGGCACCACC     | 980  |
| DRB5*01:01:01v1      | GGTGTGGAAGATTTGTGATAATATGAGGAGGCCAGTTCAGACTGTCCCTGGCACCACC     | 978  |
| DRB5*01:01:01v1_STR1 | GGTGTGGAAGATTTGTGATAATATGAGGAGGCCAGTTCAGACTGTCCCTGGCACCACC     | 988  |
| DRB5*01:08Ne1        | GGTGTGGAAGATTTGTGATAATATGAGGAGGCCAGTTCAGACTGTCCCTGGCACCACC     | 1012 |
| DRB5*01:03e1         | GGTGTGGAAGATTTGTGATAATATGAGGAGGCCAGTTCAGACTGTCCCTGGCACCACC     | 1014 |
| DRB5*01:02e1         | GGTGTGGAAGATTTGTGATAATATGAGGAGGCCAGTTCAGACTGTCCCTGGCACCACC     | 1020 |
| DRB5*01:02e1_STR1    | GGTGTGGAAGATTTGTGATAATATGAGGAGGCCAGTTCAGACTGTCCCTGGCACCACC     | 1014 |
| -----                |                                                                |      |
| DRB5*02:02e1_STR1    | CTTCACGCAGTCTCTGAAATAAAAAGGGTGTGGTGTGGTTTGCAAAAGCATTAGATTAAT   | 1040 |
| DRB5*02:02e1         | CTTCACGCAGTCTCTGAAATAAAAAGGGTGTGGTGTGGTTTGCAAAAGCATTAGATTAAT   | 1044 |
| DRB5*02:03e1         | CTTCACGCAGTCTCTGAAATAAAAAGGGTGTGGTGTGGTTTGCAAAAGCATTAGATTAAT   | 1039 |
| DRB5*01:01:01_HGP    | CTTCACGCAGTCTCTGAAATAAAAAGGTGTGGTGTGGTTTGCAAAAGCATTAGATTAAT    | 1044 |
| DRB5*01:01:01_STR1   | CTTCACGCAGTCTCTGAAATAAAAAGGTGTGGTGTGGTTTGCAAAAGCATTAGATTAAT    | 1040 |
| DRB5*01:01:01v1      | CTTCACGCAGTCTCTGAAATAAAAAGGTGTGGTGTGGTTTGCAAAAGCATTAGATTAAT    | 1038 |
| DRB5*01:01:01v1_STR1 | CTTCACGCAGTCTCTGAAATAAAAAGGTGTGGTGTGGTTTGCAAAAGCATTAGATTAAT    | 1048 |
| DRB5*01:08Ne1        | CTTCACGCAGTCTCTGAAATAAAAAGGTGTGGTGTGGTTTGCAAAAGCATTAGATTAAT    | 1072 |
| DRB5*01:03e1         | CTTCACGCAGTCTCTGAAATAAAAAGGTGTGGTGTGGTTTGCAAAAGCATTAGATTAAT    | 1074 |
| DRB5*01:02e1         | CTTCACGCAGTCTCTGAAATAAAAAGGTGTGGTGTGGTTTGCAAAAGCATTAGATTAAT    | 1080 |
| DRB5*01:02e1_STR1    | CTTCACGCAGTCTCTGAAATAAAAAGGTGTGGTGTGGTTTGCAAAAGCATTAGATTAAT    | 1074 |
| -----                |                                                                |      |
| DRB5*02:02e1_STR1    | TTCTAGGGGAATTGAAGAGACCTCTGAGGCACCTCTGAAGCTTCTTTAGGTCTAAATTTTCT | 1100 |
| DRB5*02:02e1         | TTCTAGGGGAATTGAAGAGACCTCTGAGGCACCTCTGAAGCTTCTTTAGGTCTAAATTTTCT | 1104 |
| DRB5*02:03e1         | TTCTAGGGGAATTGAAGAGACCTCTGAGGCACCTCTGAAGCTTCTTTAGGTCTAAATTTTCT | 1099 |
| DRB5*01:01:01_HGP    | TTCTAGGGGAATTGAGGAGACCTCTGAGGCACCTCTGAAGCTTCTTTAGGTCTAAATTTTCT | 1104 |
| DRB5*01:01:01_STR1   | TTCTAGGGGAATTGAGGAGACCTCTGAGGCACCTCTGAAGCTTCTTTAGGTCTAAATTTTCT | 1100 |
| DRB5*01:01:01v1      | TTCTAGGGGAATTGAGGAGACCTCTGAGGCACCTCTGAAGCTTCTTTAGGTCTAAATTTTCT | 1098 |
| DRB5*01:01:01v1_STR1 | TTCTAGGGGAATTGAGGAGACCTCTGAGGCACCTCTGAAGCTTCTTTAGGTCTAAATTTTCT | 1108 |
| DRB5*01:08Ne1        | TTCTAGGGGAATTGAGGAGACCTCTGAGGCACCTCTGAAGCTTCTTTAGGTCTAAATTTTCT | 1132 |
| DRB5*01:01:01v1_STR1 | TTCTAGGGGAATTGAGGAGACCTCTGAGGCACCTCTGAAGCTTCTTTAGGTCTAAATTTTCT | 1134 |
| DRB5*01:03e1         | TTCTAGGGGAATTGAGGAGACCTCTGAGGCACCTCTGAAGCTTCTTTAGGTCTAAATTTTCT | 1140 |
| DRB5*01:02e1         | TTCTAGGGGAATTGAGGAGACCTCTGAGGCACCTCTGAAGCTTCTTTAGGTCTAAATTTTCT | 1140 |
| DRB5*01:02e1_STR1    | TTCTAGGGGAATTGAGGAGACCTCTGAGGCACCTCTGAAGCTTCTTTAGGTCTAAATTTTCT | 1134 |
| -----                |                                                                |      |
| DRB5*02:02e1_STR1    | TTGCTATTTTTTCTGTTTGTCTTCTTAGTGTGTATATTTTTACATAGTTGAAATGACTGT   | 1160 |
| DRB5*02:02e1         | TTGCTATTTTTTCTGTTTGTCTTCTTAGTGTGTATATTTTTACATAGTTGAAATGACTGT   | 1164 |
| DRB5*02:03e1         | TTGCTATTTTTTCTGTTTGTCTTCTTAGTGTGTATATTTTTACATAGTTGAAATGACTGT   | 1159 |
| DRB5*01:01:01_HGP    | TTGCTATTTTTTCTGTTTGTCTTCTTAGTGTGTATATTTTTACATAGTTGAAATGACTGT   | 1164 |
| DRB5*01:01:01_STR1   | TTGCTATTTTTTCTGTTTGTCTTCTTAGTGTGTATATTTTTACATAGTTGAAATGACTGT   | 1160 |
| DRB5*01:01:01v1      | TTGCTATTTTTTCTGTTTGTCTTCTTAGTGTGTATATTTTTACATAGTTGAAATGACTGT   | 1158 |
| DRB5*01:01:01v1_STR1 | TTGCTATTTTTTCTGTTTGTCTTCTTAGTGTGTATATTTTTACATAGTTGAAATGACTGT   | 1168 |
| DRB5*01:08Ne1        | TTGCTATTTTTTCTGTTTGTCTTCTTAGTGTGTATATTTTTACATAGTTGAAATGACTGT   | 1192 |
| DRB5*01:03e1         | TTGCTATTTTTTCTGTTTGTCTTCTTAGTGTGTATATTTTTACATAGTTGAAATGACTGT   | 1194 |
| DRB5*01:02e1         | TTGCTATTTTTTCTGTTTGTCTTCTTAGTGTGTATATTTTTACATAGTTGAAATGACTGT   | 1200 |
| DRB5*01:02e1_STR1    | TTGCTATTTTTTCTGTTTGTCTTCTTAGTGTGTATATTTTTACATAGTTGAAATGACTGT   | 1194 |
| -----                |                                                                |      |
| DRB5*02:02e1_STR1    | GAAACTAACTTTTTGATTAATAAATTTAATACACTGTTACTATTTTTATTATAATGCTAATA | 1220 |
| DRB5*02:02e1         | GAAACTAACTTTTTGATTAATAAATTTAATACACTGTTACTATTTTTATTATAATGCTAATA | 1224 |
| DRB5*02:03e1         | GAAACTAACTTTTTGATTAATAAATTTAATACACTGTTACTATTTTTATTATAATGCTAATA | 1219 |
| DRB5*01:01:01_HGP    | GAAACTAACTTTTTGATTAATAAATTTAATACACTGTTACTATTTTTATTATAATGCTAATA | 1224 |

|                      |                                                               |      |
|----------------------|---------------------------------------------------------------|------|
| DRB5*01:01:01_STR1   | GAAACTAACTTTTGGATTAATAAATTTAATACACTGTTACTATTTTATTATAATGCTAATA | 1220 |
| DRB5*01:01:01v1      | GAAACTAACTTTTGGATTAATAAATTTAATACACTGTTACTATTTTATTATAATGCTAATA | 1218 |
| DRB5*01:01:01v1_STR1 | GAAACTAACTTTTGGATTAATAAATTTAATACACTGTTACTATTTTATTATAATGCTAATA | 1228 |
| DRB5*01:08Ne1        | GAAACTAACTTTTGGATTAATAAATTTAATACACTGTTACTATTTTATTATAATGCTAATA | 1252 |
| DRB5*01:03e1         | GAAACTAACTTTTGGATTAATAAATTTAATACACTGTTACTATTTTATTATAATGCTAATA | 1254 |
| DRB5*01:02e1         | GAAACTAACTTTTGGATTAATAAATTTAATACACTGTTACTATTTTATTATAATGCTAATA | 1260 |
| DRB5*01:02e1_STR1    | GAAACTAACTTTTGGATTAATAAATTTAATACACTGTTACTATTTTATTATAATGCTAATA | 1254 |
| -----                |                                                               |      |
| DRB5*02:02e1_STR1    | GTTTTCTACTACTTACCATTATTCTTTTATATATAATAGTTGTGACACAACCTTATCTCA  | 1280 |
| DRB5*02:02e1         | GTTTTCTACTACTTACCATTATTCTTTTATATATAATAGTTGTGACACAACCTTATCTCA  | 1284 |
| DRB5*02:03e1         | GTTTTCTACTACTTACCATTATTCTTTTATATATAATAGTTGTGACACAACCTTATCTCA  | 1279 |
| DRB5*01:01:01_HGP    | GTTTTCTACTACTTACCATTATTCTTTTATATATAATAGTTGTGACACAACCTTATCTCA  | 1284 |
| DRB5*01:01:01_STR1   | GTTTTCTACTACTTACCATTATTCTTTTATATATAATAGTTGTGACACAACCTTATCTCA  | 1280 |
| DRB5*01:01:01v1      | GTTTTCTACTACTTACCATTATTCTTTTATATATAATAGTTGTGACACAACCTTATCTCA  | 1278 |
| DRB5*01:01:01v1_STR1 | GTTTTCTACTACTTACCATTATTCTTTTATATATAATAGTTGTGACACAACCTTATCTCA  | 1288 |
| DRB5*01:08Ne1        | GTTTTCTACTACTTACCATTATTCTTTTATATATAATAGTTGTGACACAACCTTATCTCA  | 1312 |
| DRB5*01:03e1         | GTTTTCTACTACTTACCATTATTCTTTTATATATAATAGTTGTGACACAACCTTATCTCA  | 1314 |
| DRB5*01:02e1         | GTTTTCTACTACTTACCATTATTCTTTTATATATAATAGTTGTGACACAACCTTATCTCA  | 1320 |
| DRB5*01:02e1_STR1    | GTTTTCTACTACTTACCATTATTCTTTTATATATAATAGTTGTGACACAACCTTATCTCA  | 1314 |
| -----                |                                                               |      |
| DRB5*02:02e1_STR1    | CTTCCCTTTGTTGACCTTTTATTATGACATTCACAAAAGTTGAAAATATATGTTTCTG    | 1340 |
| DRB5*02:02e1         | CTTCCCTTTGTTGACCTTTTATTATGACATTCACAAAAGTTGAAAATATATGTTTCTG    | 1344 |
| DRB5*02:03e1         | CTTCCCTTTGTTGACCTTTTATTATGACATTCACAAAAGTTGAAAATATATGTTTCTG    | 1339 |
| DRB5*01:01:01_HGP    | CTTCCCTTTGTTGACCTTTTATTATGACATTCACAAAAGTTGAAAATATATGTTTCTG    | 1344 |
| DRB5*01:01:01_STR1   | CTTCCCTTTGTTGACCTTTTATTATGACATTCACAAAAGTTGAAAATATATGTTTCTG    | 1340 |
| DRB5*01:01:01v1      | CTTCCCTTTGTTGACCTTTTATTATGACATTCACAAAAGTTGAAAATATATGTTTCTG    | 1338 |
| DRB5*01:01:01v1_STR1 | CTTCCCTTTGTTGACCTTTTATTATGACATTCACAAAAGTTGAAAATATATGTTTCTG    | 1348 |
| DRB5*01:08Ne1        | CTTCCCTTTGTTGACCTTTTATTATGACATTCACAAAAGTTGAAAATATATGTTTCTG    | 1372 |
| DRB5*01:03e1         | CTTCCCTTTGTTGACCTTTTATTATGACATTCACAAAAGTTGAAAATATATGTTTCTG    | 1374 |
| DRB5*01:02e1         | CTTCCCTTTGTTGACCTTTTATTATGACATTCACAAAAGTTGAAAATATATGTTTCTG    | 1380 |
| DRB5*01:02e1_STR1    | CTTCCCTTTGTTGACCTTTTATTATGACATTCACAAAAGTTGAAAATATATGTTTCTG    | 1374 |
| -----                |                                                               |      |
| DRB5*02:02e1_STR1    | GTTAATATTTAATTTATTTTTTTTATTGGAATTCCTTTGAATTATCTTGACCTATTTATT  | 1400 |
| DRB5*02:02e1         | GTTAATATTTAATTTATTTTTTTTATTGGAATTCCTTTGAATTATCTTGACCTATTTATT  | 1404 |
| DRB5*02:03e1         | GTTAATATTTAATTTATTTTTTTTATTGGAATTCCTTTGAATTATCTTGACCTATTTATT  | 1399 |
| DRB5*01:01:01_HGP    | GTTAATATTTAATTTATTTTTTTTATTGGAATTCCTTTGAATTATCTTGACCTATTTATT  | 1404 |
| DRB5*01:01:01_STR1   | GTTAATATTTAATTTATTTTTTTTATTGGAATTCCTTTGAATTATCTTGACCTATTTATT  | 1400 |
| DRB5*01:01:01v1      | GTTAATATTTAATTTATTTTTTTTATTGGAATTCCTTTGAATTATCTTGACCTATTTATT  | 1398 |
| DRB5*01:01:01v1_STR1 | GTTAATATTTAATTTATTTTTTTTATTGGAATTCCTTTGAATTATCTTGACCTATTTATT  | 1408 |
| DRB5*01:08Ne1        | GTTAATATTTAATTTATTTTTTTTATTGGAATTCCTTTGAATTATCTTGACCTATTTATT  | 1432 |
| DRB5*01:03e1         | GTTAATATTTAATTTATTTTTTTTATTGGAATTCCTTTGAATTATCTTGACCTATTTATT  | 1434 |
| DRB5*01:02e1         | GTTAATATTTAATTTATTTTTTTTATTGGAATTCCTTTGAATTATCTTGACCTATTTATT  | 1440 |
| DRB5*01:02e1_STR1    | GTTAATATTTAATTTATTTTTTTTATTGGAATTCCTTTGAATTATCTTGACCTATTTATT  | 1434 |
| -----                |                                                               |      |
| DRB5*02:02e1_STR1    | GCCCAATTATAAATACTGCTCTAAGAATTCCTATTGTATTTGGTAGGTAATGGACAATG   | 1460 |
| DRB5*02:02e1         | GCCCAATTATAAATACTGCTCTAAGAATTCCTATTGTATTTGGTAGGTAATGGACAATG   | 1464 |
| DRB5*02:03e1         | GCCCAATTATAAATACTGCTCTAAGAATTCCTATTGTATTTGGTAGGTAATGGACAATG   | 1459 |
| DRB5*01:01:01_HGP    | GCCCAATTATAAATACTGCTCTAAGAATTCCTATTGTATTTGGTAGGTAATGGACAATG   | 1464 |
| DRB5*01:01:01_STR1   | GCCCAATTATAAATACTGCTCTAAGAATTCCTATTGTATTTGGTAGGTAATGGACAATG   | 1460 |
| DRB5*01:01:01v1      | GCCCAATTATAAATACTGCTCTAAGAATTCCTATTGTATTTGGTAGGTAATGGACAATG   | 1458 |
| DRB5*01:01:01v1_STR1 | GCCCAATTATAAATACTGCTCTAAGAATTCCTATTGTATTTGGTAGGTAATGGACAATG   | 1468 |
| DRB5*01:08Ne1        | GCCCAATTATAAATACTGCTCTAAGAATTCCTATTGTATTTGGTAGGTAATGGACAATG   | 1492 |
| DRB5*01:03e1         | GCCCAATTATAAATACTGCTCTAAGAATTCCTATTGTATTTGGTAGGTAATGGACAATG   | 1494 |
| DRB5*01:02e1         | GCCCAATTATAAATACTGCTCTAAGAATTCCTATTGTATTTGGTAGGTAATGGACAATG   | 1500 |
| DRB5*01:02e1_STR1    | GCCCAATTATAAATACTGCTCTAAGAATTCCTATTGTATTTGGTAGGTAATGGACAATG   | 1494 |
| -----                |                                                               |      |
| DRB5*02:02e1_STR1    | ATCTATTTTCTGTTATCTCCAGGGCTTAGTATTTTCTCAGTGATTTTGTGGGTTCTTTG   | 1520 |
| DRB5*02:02e1         | ATCTATTTTCTGTTATCTCCAGGGCTTAGTATTTTCTCAGTGATTTTGTGGGTTCTTTG   | 1524 |
| DRB5*02:03e1         | ATCTATTTTCTGTTATCTCCAGGGCTTAGTATTTTCTCAGTGATTTTGTGGGTTCTTTG   | 1519 |
| DRB5*01:01:01_HGP    | ATCTATTTTCTGTTATCTCCAGGGCTTAGTATTTTCTCAGTGATTTTGTGGGTTCTTTG   | 1524 |
| DRB5*01:01:01_STR1   | ATCTATTTTCTGTTATCTCCAGGGCTTAGTATTTTCTCAGTGATTTTGTGGGTTCTTTG   | 1520 |
| DRB5*01:01:01v1      | ATCTATTTTCTGTTATCTCCAGGGCTTAGTATTTTCTCAGTGATTTTGTGGGTTCTTTG   | 1518 |
| DRB5*01:01:01v1_STR1 | ATCTATTTTCTGTTATCTCCAGGGCTTAGTATTTTCTCAGTGATTTTGTGGGTTCTTTG   | 1528 |
| DRB5*01:08Ne1        | ATCTATTTTCTGTTATCTCCAGGGCTTAGTATTTTCTCAGTGATTTTGTGGGTTCTTTG   | 1552 |
| DRB5*01:03e1         | ATCTATTTTCTGTTATCTCCAGGGCTTAGTATTTTCTCAGTGATTTTGTGGGTTCTTTG   | 1554 |
| DRB5*01:02e1         | ATCTATTTTCTGTTATCTCCAGGGCTTAGTATTTTCTCAGTGATTTTGTGGGTTCTTTG   | 1560 |
| DRB5*01:02e1_STR1    | ATCTATTTTCTGTTATCTCCAGGGCTTAGTATTTTCTCAGTGATTTTGTGGGTTCTTTG   | 1554 |
| -----                |                                                               |      |
| DRB5*02:02e1_STR1    | TACTGTAAGATTATTAACACTTTATTGATATTTGATTCACATTTTCTCCAGTTTGTGAT   | 1580 |
| DRB5*02:02e1         | TACTGTAAGATTATTAACACTTTATTGATATTTGATTCACATTTTCTCCAGTTTGTGAT   | 1584 |
| DRB5*02:03e1         | TACTGTAAGATTATTAACACTTTATTGATATTTGATTCACATTTTCTCCAGTTTGTGAT   | 1579 |
| DRB5*01:01:01_HGP    | TACTGTAAGATTATTAACACTTTATTGATATTTGATTCACATTTTCTCCAGTTTGTGAT   | 1584 |
| DRB5*01:01:01_STR1   | TACTGTAAGATTATTAACACTTTATTGATATTTGATTCACATTTTCTCCAGTTTGTGAT   | 1580 |
| DRB5*01:01:01v1      | TACTGTAAGATTATTAACACTTTATTGATATTTGATTCACATTTTCTCCAGTTTGTGAT   | 1578 |
| DRB5*01:01:01v1_STR1 | TACTGTAAGATTATTAACACTTTATTGATATTTGATTCACATTTTCTCCAGTTTGTGAT   | 1588 |
| DRB5*01:08Ne1        | TACTGTAAGATTATTAACACTTTATTGATATTTGATTCACATTTTCTCCAGTTTGTGAT   | 1612 |
| DRB5*01:03e1         | TACTGTAAGATTATTAACACTTTATTGATATTTGATTCACATTTTCTCCAGTTTGTGAT   | 1614 |
| DRB5*01:02e1         | TACTGTAAGATTATTAACACTTTATTGATATTTGATTCACATTTTCTCCAGTTTGTGAT   | 1620 |
| DRB5*01:02e1_STR1    | TACTGTAAGATTATTAACACTTTATTGATATTTGATTCACATTTTCTCCAGTTTGTGAT   | 1614 |
| -----                |                                                               |      |
| DRB5*02:02e1_STR1    | TTGTATGTTGATTTGAAAATTCATGTTAAGAATTTGAACATTTCTGTTTAAATAAATA    | 1640 |
| DRB5*02:02e1         | TTGTATGTTGATTTGAAAATTCATGTTAAGAATTTGAACATTTCTGTTTAAATAAATA    | 1644 |

DRB5\*02:03e1 TTGTATGTTGATTTTGA AAAATTCATGTTAAGAATTTGAACATTTCTGTTTAATAAAAATA 1639  
DRB5\*01:01:01\_HGP TTGTATGTTGATTTTGA AAAATTCATGTTAAGAATTTGAACATTTCTGTTTAATAAAAATA 1644  
DRB5\*01:01:01\_STR1 TTGTATGTTGATTTTGA AAAATTCATGTTAAGAATTTGAACATTTCTGTTTAATAAAAATA 1640  
DRB5\*01:01:01v1 TTGTATGTTGATTTTGA AAAATTCATGTTAAGAATTTGAACATTTCTGTTTAATAAAAATA 1638  
DRB5\*01:01:01v1\_STR1 TTGTATGTTGATTTTGA AAAATTCATGTTAAGAATTTGAACATTTCTGTTTAATAAAAATA 1648  
DRB5\*01:08Ne1 TTGTATGTTGATTTTGA AAAATTCATGTTAAGAATTTGAACATTTCTGTTTAATAAAAATA 1672  
DRB5\*01:03e1 TTGTATGTTGATTTTGA AAAATTCATGTTAAGAATTTGAACATTTCTGTTTAATAAAAATA 1674  
DRB5\*01:02e1 TTGTATGTTGATTTTGA AAAATTCATGTTAAGAATTTGAACATTTCTGTTTAATAAAAATA 1680  
DRB5\*01:02e1\_STR1 TTGTATGTTGATTTTGA AAAATTCATGTTAAGAATTTGAACATTTCTGTTTAATAAAAATA 1674

DRB5\*02:02e1\_STR1 TATTC CAAAAC TTTTATTAATGGTTTACAAACCATCTTAAATCTATCATTTTGTGGTATT 1700  
DRB5\*02:02e1 TATTC CAAAAC TTTTATTAATGGTTTACAAACCATCTTAAATCTATCATTTTGTGGTATT 1704  
DRB5\*02:03e1 TATTC CAAAAC TTTTATTAATGGTTTACAAACCATCTTAAATCTATCATTTTGTGGTATT 1699  
DRB5\*01:01:01\_HGP TATTC CAAAAC TTTTATTAATGGTTTACAAACCATCTTAAATCTATCATTTTGTGGTATT 1704  
DRB5\*01:01:01\_STR1 TATTC CAAAAC TTTTATTAATGGTTTACAAACCATCTTAAATCTATCATTTTGTGGTATT 1700  
DRB5\*01:01:01v1 TATTC CAAAAC TTTTATTAATGGTTTACAAACCATCTTAAATCTATCATTTTGTGGTATT 1698  
DRB5\*01:01:01v1\_STR1 TATTC CAAAAC TTTTATTAATGGTTTACAAACCATCTTAAATCTATCATTTTGTGGTATT 1708  
DRB5\*01:08Ne1 TATTC CAAAAC TTTTATTAATGGTTTACAAACCATCTTAAATCTATCATTTTGTGGTATT 1732  
DRB5\*01:03e1 TATTC CAAAAC TTTTATTAATGGTTTACAAACCATCTTAAATCTATCATTTTGTGGTATT 1734  
DRB5\*01:02e1 TATTC CAAAAC TTTTATTAATGGTTTACAAACCATCTTAAATCTATCATTTTGTGGTATT 1740  
DRB5\*01:02e1\_STR1 TATTC CAAAAC TTTTATTAATGGTTTACAAACCATCTTAAATCTATCATTTTGTGGTATT 1734

DRB5\*02:02e1\_STR1 TTTGTCTCCAGGTTTCTCCTTCTTCTTAAAAAAAATGATTTATTGAGAGTCTGCTAGT 1760  
DRB5\*02:02e1 TTTGTCTCCAGGTTTCTCCTTCTTCTTAAAAAAAATGATTTATTGAGAGTCTGCTAGT 1764  
DRB5\*02:03e1 TTTGTCTCCAGGTTTCTCCTTCTTCTTAAAAAAAATGATTTATTGAGAGTCTGCTAGT 1759  
DRB5\*01:01:01\_HGP TTTGTCTCCAGGTTTCTCCTTCTTCTTAAAAAAAATGATTTATTGAGAGTCTGCTAGT 1764  
DRB5\*01:01:01\_STR1 TTTGTCTCCAGGTTTCTCCTTCTTCTTAAAAAAAATGATTTATTGAGAGTCTGCTAGT 1760  
DRB5\*01:01:01v1 TTTGTCTCCAGGTTTCTCCTTCTTCTTAAAAAAAATGATTTATTGAGAGTCTGCTAGT 1758  
DRB5\*01:01:01v1\_STR1 TTTGTCTCCAGGTTTCTCCTTCTTCTTAAAAAAAATGATTTATTGAGAGTCTGCTAGT 1768  
DRB5\*01:08Ne1 TTTGTCTCCAGGTTTCTCCTTCTTCTTAAAAAAAATGATTTATTGAGAGTCTGCTAGT 1792  
DRB5\*01:03e1 TTTGTCTCCAGGTTTCTCCTTCTTCTTAAAAAAAATGATTTATTGAGAGTCTGCTAGT 1794  
DRB5\*01:02e1 TTTGTCTCCAGGTTTCTCCTTCTTCTTAAAAAAAATGATTTATTGAGAGTCTGCTAGT 1800  
DRB5\*01:02e1\_STR1 TTTGTCTCCAGGTTTCTCCTTCTTCTTAAAAAAAATGATTTATTGAGAGTCTGCTAGT 1794

DRB5\*02:02e1\_STR1 GTTAGGGATTTTCTTAGGCATAAGCACCCCAAGTAATGAGTCCAGACCCTGCCTGCCTT 1820  
DRB5\*02:02e1 GTTAGGGATTTTCTTAGGCATAAGCACCCCAAGTAATGAGTCCAGACCCTGCCTGCCTT 1824  
DRB5\*02:03e1 GTTAGGGATTTTCTTAGGCATAAGCACCCCAAGTAATGAGTCCAGACCCTGCCTGCCTT 1819  
DRB5\*01:01:01\_HGP GTTAGGGATTTTCTTAGGCATAAGCACCCCAAGTAATGAGTCCAGACCCTGCCTGCCTT 1824  
DRB5\*01:01:01\_STR1 GTTAGGGATTTTCTTAGGCATAAGCACCCCAAGTAATGAGTCCAGACCCTGCCTGCCTT 1820  
DRB5\*01:01:01v1 GTTAGGGATTTTCTTAGGCATAAGCACCCCAAGTAATGAGTCCAGACCCTGCCTGCCTT 1818  
DRB5\*01:01:01v1\_STR1 GTTAGGGATTTTCTTAGGCATAAGCACCCCAAGTAATGAGTCCAGACCCTGCCTGCCTT 1828  
DRB5\*01:08Ne1 GTTAGGGATTTTCTTAGGCATAAGCACCCCAAGTAATGAGTCCAGACCCTGCCTGCCTT 1852  
DRB5\*01:03e1 GTTAGGGATTTTCTTAGGCATAAGCACCCCAAGTAATGAGTCCAGACCCTGCCTGCCTT 1854  
DRB5\*01:02e1 GTTAGGGATTTTCTTAGGCATAAGCACCCCAAGTAATGAGTCCAGACCCTGCCTGCCTT 1860  
DRB5\*01:02e1\_STR1 GTTAGGGATTTTCTTAGGCATAAGCACCCCAAGTAATGAGTCCAGACCCTGCCTGCCTT 1854

DRB5\*02:02e1\_STR1 GATCCAAATGTCATTCTGGAAGAAAAATATTTTACAATGATAGTATAATAATAGTTAT 1880  
DRB5\*02:02e1 GATCCAAATGTCATTCTGGAAGAAAAATATTTTACAATGATAGTATAATAATAGTTAT 1884  
DRB5\*02:03e1 GATCCAAATGTCATTCTGGAAGAAAAATATTTTACAATGATAGTATAATAATAGTTAT 1879  
DRB5\*01:01:01\_HGP GATCCAAATGTCATTCTGGAAGAAAAATATTTTACAATGATAGTATAATAATAGTTAT 1884  
DRB5\*01:01:01\_STR1 GATCCAAATGTCATTCTGGAAGAAAAATATTTTACAATGATAGTATAATAATAGTTAT 1880  
DRB5\*01:01:01v1 GATCCAAATGTCATTCTGGAAGAAAAATATTTTACAATGATAGTATAATAATAGTTAT 1878  
DRB5\*01:01:01v1\_STR1 GATCCAAATGTCATTCTGGAAGAAAAATATTTTACAATGATAGTATAATAATAGTTAT 1888  
DRB5\*01:08Ne1 GATCCAAATGTCATTCTGGAAGAAAAATATTTTACAATGATAGTATAATAATAGTTAT 1912  
DRB5\*01:03e1 GATCCAAATGTCATTCTGGAAGAAAAATATTTTACAATGATAGTATAATAATAGTTAT 1914  
DRB5\*01:02e1 GATCCAAATGTCATTCTGGAAGAAAAATATTTTACAATGATAGTATAATAATAGTTAT 1920  
DRB5\*01:02e1\_STR1 GATCCAAATGTCATTCTGGAAGAAAAATATTTTACAATGATAGTATAATAATAGTTAT 1914

DRB5\*02:02e1\_STR1 GCTTGTGTTGCATGGGAGATGCATTGATCAGCTAAATGTAATGTAAGAATTTTCAAACCT 1940  
DRB5\*02:02e1 GCTTGTGTTGCATGGGAGATGCATTGATCAGCTAAATGTAATGTAAGAATTTTCAAACCT 1944  
DRB5\*02:03e1 GCTTGTGTTGCATGGGAGATGCATTGATCAGCTAAATGTAATGTAAGAATTTTCAAACCT 1939  
DRB5\*01:01:01\_HGP GCTTGTGTTGCATGGGAGATGCATTGATCAGCTAAATGTAATGTAAGAATTTTCAAACCT 1944  
DRB5\*01:01:01\_STR1 GCTTGTGTTGCATGGGAGATGCATTGATCAGCTAAATGTAATGTAAGAATTTTCAAACCT 1940  
DRB5\*01:01:01v1 GCTTGTGTTGCATGGGAGATGCATTGATCAGCTAAATGTAATGTAAGAATTTTCAAACCT 1938  
DRB5\*01:01:01v1\_STR1 GCTTGTGTTGCATGGGAGATGCATTGATCAGCTAAATGTAATGTAAGAATTTTCAAACCT 1948  
DRB5\*01:08Ne1 GCTTGTGTTGCATGGGAGATGCATTGATCAGCTAAATGTAATGTAAGAATTTTCAAACCT 1972  
DRB5\*01:03e1 GCTTGTGTTGCATGGGAGATGCATTGATCAGCTAAATGTAATGTAAGAATTTTCAAACCT 1974  
DRB5\*01:02e1 GCTTGTGTTGCATGGGAGATGCATTGATCAGCTAAATGTAATGTAAGAATTTTCAAACCT 1980  
DRB5\*01:02e1\_STR1 GCTTGTGTTGCATGGGAGATGCATTGATCAGCTAAATGTAATGTAAGAATTTTCAAACCT 1974

DRB5\*02:02e1\_STR1 AAAATAACTTTCCCTTAATCCCTTCTCTGCTTTATGACTCATGCTTTCCCTGGGAAC TTAA 2000  
DRB5\*02:02e1 AAAATAACTTTCCCTTAATCCCTTCTCTGCTTTATGACTCATGCTTTCCCTGGGAAC TTAA 2004  
DRB5\*02:03e1 AAAATAACTTTCCCTTAATCCCTTCTCTGCTTTATGACTCATGCTTTCCCTGGGAAC TTAA 1999  
DRB5\*01:01:01\_HGP AAAATAACTTTCCCTTAATCCCTTCTCTGCTTTATGACTCATGCTTTGCTGGGAAC TTAA 2004  
DRB5\*01:01:01\_STR1 AAAATAACTTTCCCTTAATCCCTTCTCTGCTTTATGACTCATGCTTTGCTGGGAAC TTAA 2000  
DRB5\*01:01:01v1 AAAATAACTTTCCCTTAATCCCTTCTCTGCTTTATGACTCATGCTTTGCTGGGAAC TTAA 1998  
DRB5\*01:01:01v1\_STR1 AAAATAACTTTCCCTTAATCCCTTCTCTGCTTTATGACTCATGCTTTGCTGGGAAC TTAA 2008  
DRB5\*01:08Ne1 AAAATAACTTTCCCTTAATCCCTTCTCTGCTTTATGACTCATGCTTTGCTGGGAAC TTAA 2032  
DRB5\*01:03e1 AAAATAACTTTCCCTTAATCCCTTCTCTGCTTTATGACTCATGCTTTGCTGGGAAC TTAA 2034  
DRB5\*01:02e1 AAAATAACTTTCCCTTAATCCCTTCTCTGCTTTATGACTCATGCTTTGCTGGGAAC TTAA 2040  
DRB5\*01:02e1\_STR1 AAAATAACTTTCCCTTAATCCCTTCTCTGCTTTATGACTCATGCTTTGCTGGGAAC TTAA 2034

DRB5\*02:02e1\_STR1 AGATTGGAGAACCATTCTGTCTGTCTACCTTCCCAGGGGCACAACCATTCTGTGGTG 2060  
DRB5\*02:02e1 AGATTGGAGAACCATTCTGTCTGTCTACCTTCCCAGGGGCACAACCATTCTGTGGTG 2064  
DRB5\*02:03e1 AGATTGGAGAACCATTCTGTCTGTCTACCTTCCCAGGGGCACAACCATTCTGTGGTG 2059  
DRB5\*01:01:01\_HGP AGATTGGAGAACCATTCTGTCTGTCTACCTTCCCAGGGGCACAACCATTCTGTGGTG 2064  
DRB5\*01:01:01\_STR1 AGATTGGAGAACCATTCTGTCTGTCTACCTTCCCAGGGGCACAACCATTCTGTGGTG 2060  
DRB5\*01:01:01v1 AGATTGGAGAACCATTCTGTCTGTCTACCTTCCCAGGGGCACAACCATTCTGTGGTG 2058  
DRB5\*01:01:01v1\_STR1 AGATTGGAGAACCATTCTGTCTGTCTACCTTCCCAGGGGCACAACCATTCTGTGGTG 2068  
DRB5\*01:08Ne1 AGATTGGAGAACCATTCTGTCTGTCTACCTTCCCAGGGGCACAACCATTCTGTGGTG 2092  
DRB5\*01:03e1 AGATTGGAGAACCATTCTGTCTGTCTACCTTCCCAGGGGCACAACCATTCTGTGGTG 2094  
DRB5\*01:02e1 AGATTGGAGAACCATTCTGTCTGTCTACCTTCCCAGGGGCACAACCATTCTGTGGTG 2100  
DRB5\*01:02e1\_STR1 AGATTGGAGAACCATTCTGTCTGTCTACCTTCCCAGGGGCACAACCATTCTGTGGTG 2094

DRB5\*02:02e1\_STR1 TTCTAAGGTGTGAGTGCATGGCAGTAGTATTCCATAAACATTCATACTCAGTCTCCTTTTG 2120  
DRB5\*02:02e1 TTCTAAGGTGTGAGTGCATGGCAGTAGTATTCCATAAACATTCATACTCAGTCTCCTTTTG 2124  
DRB5\*02:03e1 TTCTAAGGTGTGAGTGCATGGCAGTAGTATTCCATAAACATTCATACTCAGTCTCCTTTTG 2119  
DRB5\*01:01:01\_HGP TTCTAAGGTGTGAGTGCATGGCAGTAGTATTCCATAAACATTCATACTCAGTCTCCTTTTG 2124  
DRB5\*01:01:01\_STR1 TTCTAAGGTGTGAGTGCATGGCAGTAGTATTCCATAAACATTCATACTCAGTCTCCTTTTG 2120  
DRB5\*01:01:01v1 TTCTAAGGTGTGAGTGCATGGCAGTAGTATTCCATAAACATTCATACTCAGTCTCCTTTTG 2118  
DRB5\*01:01:01v1\_STR1 TTCTAAGGTGTGAGTGCATGGCAGTAGTATTCCATAAACATTCATACTCAGTCTCCTTTTG 2128  
DRB5\*01:08Ne1 TTCTAAGGTGTGAGTGCATGGCAGTAGTATTCCATAAACATTCATACTCAGTCTCCTTTTG 2152  
DRB5\*01:01:03e1 TTCTAAGGTGTGAGTGCATGGCAGTAGTATTCCATAAACATTCATACTCAGTCTCCTTTTG 2154  
DRB5\*01:02e1 TTCTAAGGTGTGAGTGCATGGCAGTAGTATTCCATAAACATTCATACTCAGTCTCCTTTTG 2160  
DRB5\*01:02e1\_STR1 TTCTAAGGTGTGAGTGCATGGCAGTAGTATTCCATAAACATTCATACTCAGTCTCCTTTTG 2154

DRB5\*02:02e1\_STR1 TACCCTACTCGGTCCCTTTATCTATCCACATTACTTTAAATCATATTTTTCTCTCAAGCT 2180  
DRB5\*02:02e1 TACCCTACTCGGTCCCTTTATCTATCCACATTACTTTAAATCATATTTTTCTCTCAAGCT 2184  
DRB5\*02:03e1 TACCCTACTCGGTCCCTTTATCTATCCACATTACTTTAAATCATATTTTTCTCTCAAGCT 2179  
DRB5\*01:01:01\_HGP TACCCTACTCGGTCCCTTTATCTATCCACATTACTTTAAATCATATTTTTCTCTCAAGCT 2184  
DRB5\*01:01:01\_STR1 TACCCTACTCGGTCCCTTTATCTATCCACATTACTTTAAATCATATTTTTCTCTCAAGCT 2180  
DRB5\*01:01:01v1 TACCCTACTCGGTCCCTTTATCTATCCACATTACTTTAAATCATATTTTTCTCTCAAGCT 2178  
DRB5\*01:01:01v1\_STR1 TACCCTACTCGGTCCCTTTATCTATCCACATTACTTTAAATCATATTTTTCTCTCAAGCT 2188  
DRB5\*01:08Ne1 TACCCTACTCGGTCCCTTTATCTATCCACATTACTTTAAATCATATTTTTCTCTCAAGCT 2212  
DRB5\*01:03e1 TACCCTACTCGGTCCCTTTATCTATCCACATTACTTTAAATCATATTTTTCTCTCAAGCT 2214  
DRB5\*01:02e1 TACCCTACTCGGTCCCTTTATCTATCCACATTACTTTAAATCATATTTTTCTCTCAAGCT 2220  
DRB5\*01:02e1\_STR1 TACCCTACTCGGTCCCTTTATCTATCCACATTACTTTAAATCATATTTTTCTCTCAAGCT 2214

DRB5\*02:02e1\_STR1 GTACAAGGATGATAAATAGGTGGCAAGTGGAAACACCCAAGTGTGATGAGCCCTCTCACAG 2240  
DRB5\*02:02e1 GTACAAGGATGATAAATAGGTGGCAAGTGGAAACACCCAAGTGTGATGAGCCCTCTCACAG 2244  
DRB5\*02:03e1 GTACAAGGATGATAAATAGGTGGCAAGTGGAAACACCCAAGTGTGATGAGCCCTCTCACAG 2239  
DRB5\*01:01:01\_HGP GTACAAGGATGATAAATAGGTGGCAAGTGGAAACACCCAAGTGTGATGAGCCCTCTCACAG 2244  
DRB5\*01:01:01\_STR1 GTACAAGGATGATAAATAGGTGGCAAGTGGAAACACCCAAGTGTGATGAGCCCTCTCACAG 2240  
DRB5\*01:01:01v1 GTACAAGGATGATAAATAGGTGGCAAGTGGAAACACCCAAGTGTGATGAGCCCTCTCACAG 2238  
DRB5\*01:01:01v1\_STR1 GTACAAGGATGATAAATAGGTGGCAAGTGGAAACACCCAAGTGTGATGAGCCCTCTCACAG 2248  
DRB5\*01:08Ne1 GTACAAGGATGATAAATAGGTGGCAAGTGGAAACACCCAAGTGTGATGAGCCCTCTCACAG 2272  
DRB5\*01:03e1 GTACAAGGATGATAAATAGGTGGCAAGTGGAAACACCCAAGTGTGATGAGCCCTCTCACAG 2274  
DRB5\*01:02e1 GTACAAGGATGATAAATAGGTGGCAAGTGGAAACACCCAAGTGTGATGAGCCCTCTCACAG 2280  
DRB5\*01:02e1\_STR1 GTACAAGGATGATAAATAGGTGGCAAGTGGAAACACCCAAGTGTGATGAGCCCTCTCACAG 2274

DRB5\*02:02e1\_STR1 TGGAAATGGAGTGAGAAGCTTTATGACCTCATAAATTAAGGCTATCTTCAGTCATTGTTT 2300  
DRB5\*02:02e1 TGGAAATGGAGTGAGAAGCTTTATGACCTCATAAATTAAGGCTATCTTCAGTCATTGTTT 2304  
DRB5\*02:03e1 TGGAAATGGAGTGAGAAGCTTTATGACCTCATAAATTAAGGCTATCTTCAGTCATTGTTT 2299  
DRB5\*01:01:01\_HGP TGGAAATGGAGTGAGAAGCTTTATGACCTCATAAATTAAGGCTATCTTCAGTCATTGTTT 2304  
DRB5\*01:01:01\_STR1 TGGAAATGGAGTGAGAAGCTTTATGACCTCATAAATTAAGGCTATCTTCAGTCATTGTTT 2300  
DRB5\*01:01:01v1 TGGAAATGGAGTGAGAAGCTTTATGACCTCATAAATTAAGGCTATCTTCAGTCATTGTTT 2298  
DRB5\*01:01:01v1\_STR1 TGGAAATGGAGTGAGAAGCTTTATGACCTCATAAATTAAGGCTATCTTCAGTCATTGTTT 2308  
DRB5\*01:08Ne1 TGGAAATGGAGTGAGAAGCTTTATGACCTCATAAATTAAGGCTATCTTCAGTCATTGTTT 2332  
DRB5\*01:03e1 TGGAAATGGAGTGAGAAGCTTTATGACCTCATAAATTAAGGCTATCTTCAGTCATTGTTT 2334  
DRB5\*01:02e1 TGGAAATGGAGTGAGAAGCTTTATGACCTCATAAATTAAGGCTATCTTCAGTCATTGTTT 2340  
DRB5\*01:02e1\_STR1 TGGAAATGGAGTGAGAAGCTTTATGACCTCATAAATTAAGGCTATCTTCAGTCATTGTTT 2334

DRB5\*02:02e1\_STR1 TATATATTTTACGTGCATTAATCCTCATATAACCCCAAGAGGTAATTAATTAATTAATC 2360  
DRB5\*02:02e1 TATATATTTTACGTGCATTAATCCTCATATAACCCCAAGAGGTAATTAATTAATTAATC 2364  
DRB5\*02:03e1 TATATATTTTACGTGCATTAATCCTCATATAACCCCAAGAGGTAATTAATTAATTAATC 2359  
DRB5\*01:01:01\_HGP TATATATTTTATGTGCATTAATCCTCATATAACCCCAAGAGGTAATTAATTAATTAATC 2364  
DRB5\*01:01:01\_STR1 TATATATTTTATGTGCATTAATCCTCATATAACCCCAAGAGGTAATTAATTAATTAATC 2360  
DRB5\*01:01:01v1 TATATATTTTATGTGCATTAATCCTCATATAACCCCAAGAGGTAATTAATTAATTAATC 2358  
DRB5\*01:01:01v1\_STR1 TATATATTTTATGTGCATTAATCCTCATATAACCCCAAGAGGTAATTAATTAATTAATC 2368  
DRB5\*01:08Ne1 TATATATTTTACGTGCATTAATCCTCATATAACCCCAAGAGGTAATTAATTAATTAATC 2392  
DRB5\*01:03e1 TATATATTTTACGTGCATTAATCCTCATATAACCCCAAGAGGTAATTAATTAATTAATC 2394  
DRB5\*01:02e1 TATATATTTTACGTGCATTAATCCTCATATAACCCCAAGAGGTAATTAATTAATTAATC 2400  
DRB5\*01:02e1\_STR1 TATATATTTTACGTGCATTAATCCTCATATAACCCCAAGAGGTAATTAATTAATTAATC 2394

DRB5\*02:02e1\_STR1 CTCTATTATGGGTGAGAAAGTTGAGACACAGAAGAATTGAAAAACTCTCCAGCATCAAC 2420  
DRB5\*02:02e1 CTCTATTATGGGTGAGAAAGTTGAGACACAGAAGAATTGAAAAACTCTCCAGCATCAAC 2424  
DRB5\*02:03e1 CTCTATTATGGGTGAGAAAGTTGAGACACAGAAGAATTGAAAAACTCTCCAGCATCAAC 2419  
DRB5\*01:01:01\_HGP CTCTATTATGGGTGAGAAAGTTGAGACACAGAAGAATTGAAAAACTCTCCAGCATCAAC 2424  
DRB5\*01:01:01\_STR1 CTCTATTATGGGTGAGAAAGTTGAGACACAGAAGAATTGAAAAACTCTCCAGCATCAAC 2420  
DRB5\*01:01:01v1 CTCTATTATGGGTGAGAAAGTTGAGACACAGAAGAATTGAAAAACTCTCCAGCATCAAC 2418  
DRB5\*01:01:01v1\_STR1 CTCTATTATGGGTGAGAAAGTTGAGACACAGAAGAATTGAAAAACTCTCCAGCATCAAC 2428  
DRB5\*01:08Ne1 CTCTATTATGGGTGAGAAAGTTGAGACACAGAAGAATTGAAAAACTCTCCAGCATCAAC 2452  
DRB5\*01:03e1 CTCTATTATGGGTGAGAAAGTTGAGACACAGAAGAATTGAAAAACTCTCCAGCATCAAC 2454  
DRB5\*01:02e1 CTCTATTATGGGTGAGAAAGTTGAGACACAGAAGAATTGAAAAACTCTCCAGCATCAAC 2460  
DRB5\*01:02e1\_STR1 CTCTATTATGGGTGAGAAAGTTGAGACACAGAAGAATTGAAAAACTCTCCAGCATCAAC 2454

DRB5\*02:02e1\_STR1 CAGTAAAAGGCAGACCTTGGATTTGAGCCAGGCAACCTGGCTCAGGTATCAGTTTAAATT 2480  
DRB5\*02:02e1 CAGTAAAAGGCAGACCTTGGATTTGAGCCAGGCAACCTGGCTCAGGTATCAGTTTAAATT 2484  
DRB5\*02:03e1 CAGTAAAAGGCAGACCTTGGATTTGAGCCAGGCAACCTGGCTCAGGTATCAGTTTAAATT 2479  
DRB5\*01:01:01\_HGP CAGTAAAAGGCAGACCTTGGATTTGAGCCAGGCAACCTGGCTCAGGTATCAGTTTAAATT 2484  
DRB5\*01:01:01\_STR1 CAGTAAAAGGCAGACCTTGGATTTGAGCCAGGCAACCTGGCTCAGGTATCAGTTTAAATT 2480  
DRB5\*01:01:01v1 CAGTAAAAGGCAGACCTTGGATTTGAGCCAGGCAACCTGGCTCAGGTATCAGTTTAAATT 2478  
DRB5\*01:01:01v1\_STR1 CAGTAAAAGGCAGACCTTGGATTTGAGCCAGGCAACCTGGCTCAGGTATCAGTTTAAATT 2488  
DRB5\*01:08Ne1 CAGTAAAAGGCAGACCTTGGATTTGAGCCAGGCAACCTGGCTCAGGTATCAGTTTAAATT 2512  
DRB5\*01:03e1 CAGTAAAAGGCAGACCTTGGATTTGAGCCAGGCAACCTGGCTCAGGTATCAGTTTAAATT 2514  
DRB5\*01:02e1 CAGTAAAAGGCAGACCTTGGATTTGAGCCAGGCAACCTGGCTCAGGTATCAGTTTAAATT 2520  
DRB5\*01:02e1\_STR1 CAGTAAAAGGCAGACCTTGGATTTGAGCCAGGCAACCTGGCTCAGGTATCAGTTTAAATT 2514

DRB5\*02:02e1\_STR1 ACTACACTCTGTACTTTCAAAGACTTGTAAACACTTTGACAATGCATCCCAATTTCAAGT 2540  
DRB5\*02:02e1 ACTACACTCTGTACTTTCAAAGACTTGTAAACACTTTGACAATGCATCCCAATTTCAAGT 2544  
DRB5\*02:03e1 ACTACACTCTGTACTTTCAAAGACTTGTAAACACTTTGACAATGCATCCCAATTTCAAGT 2539  
DRB5\*01:01:01\_HGP ACTACACTCTGTACTTTCAAAGACTTGTAAACACTTTGACAATGCATCCCAATTTCAAGT 2544  
DRB5\*01:01:01\_STR1 ACTACACTCTGTACTTTCAAAGACTTGTAAACACTTTGACAATGCATCCCAATTTCAAGT 2540  
DRB5\*01:01:01v1 ACTACACTCTGTACTTTCAAAGACTTGTAAACACTTTGACAATGCATCCCAATTTCAAGT 2538  
DRB5\*01:01:01v1\_STR1 ACTACACTCTGTACTTTCAAAGACTTGTAAACACTTTGACAATGCATCCCAATTTCAAGT 2548  
DRB5\*01:08Ne1 ACTACACTCTGTACTTTCAAAGACTTGTAAACACTTTGACAATGCATCCCAATTTCAAGT 2572  
DRB5\*01:03e1 ACTACACTCTGTACTTTCAAAGACTTGTAAACACTTTGACAATGCATCCCAATTTCAAGT 2574  
DRB5\*01:02e1 ACTACACTCTGTACTTTCAAAGACTTGTAAACACTTTGACAATGCATCCCAATTTCAAGT 2580  
DRB5\*01:02e1\_STR1 ACTACACTCTGTACTTTCAAAGACTTGTAAACACTTTGACAATGCATCCCAATTTCAAGT 2574

DRB5\*02:02e1\_STR1 GATGAAGAAAACAAACACAATTTTTCACATCTCTCAAATCTGATGAGCCCCACTATAAAG 2600  
DRB5\*02:02e1 GATGAAGAAAACAAACACAATTTTTCACATCTCTCAAATCTGATGAGCCCCACTATAAAG 2604  
DRB5\*02:03e1 GATGAAGAAAACAAACACAATTTTTCACATCTCTCAAATCTGATGAGCCCCACTATAAAG 2599  
DRB5\*01:01:01\_HGP GATGAAGAAAACAAACACAATTTTTCACATCTCTCAAATCTGATGAGCCCCACTATAAAG 2604  
DRB5\*01:01:01\_STR1 GATGAAGAAAACAAACACAATTTTTCACATCTCTCAAATCTGATGAGCCCCACTATAAAG 2600  
DRB5\*01:01:01v1 GATGAAGAAAACAAACACAATTTTTCACATCTCTCAAATCTGATGAGCCCCACTATAAAG 2598  
DRB5\*01:01:01v1\_STR1 GATGAAGAAAACAAACACAATTTTTCACATCTCTCAAATCTGATGAGCCCCACTATAAAG 2608  
DRB5\*01:08Ne1 GATGAAGAAAACAAACACAATTTTTCACATCTCTCAAATCTGATGAGCCCCACTATAAAG 2632  
DRB5\*01:03e1 GATGAAGAAAACAAACACAATTTTTCACATCTCTCAAATCTGATGAGCCCCACTATAAAG 2634  
DRB5\*01:02e1 GATGAAGAAAACAAACACAATTTTTCACATCTCTCAAATCTGATGAGCCCCACTATAAAG 2640  
DRB5\*01:02e1\_STR1 GATGAAGAAAACAAACACAATTTTTCACATCTCTCAAATCTGATGAGCCCCACTATAAAG 2634

DRB5\*02:02e1\_STR1 ACTAAATTCAGGCTGATGACACTGTGAGGCCTCATGGCCAGCTGTGCTGGAGGCCCTGGT 2660  
DRB5\*02:02e1 ACTAAATTCAGGCTGATGACACTGTGAGGCCTCATGGCCAGCTGTGCTGGAGGCCCTGGT 2664  
DRB5\*02:03e1 ACTAAATTCAGGCTGATGACACTGTGAGGCCTCATGGCCAGCTGTGCTGGAGGCCCTGGT 2659  
DRB5\*01:01:01\_HGP ACTAAATTCAGGCTGATGACACTGTGAGGCCTCATGGCCAGCTGTGCTGGAGGCCCTGGT 2664  
DRB5\*01:01:01\_STR1 ACTAAATTCAGGCTGATGACACTGTGAGGCCTCATGGCCAGCTGTGCTGGAGGCCCTGGT 2660  
DRB5\*01:01:01v1 ACTAAATTCAGGCTGATGACACTGTGAGGCCTCATGGCCAGCTGTGCTGGAGGCCCTGGT 2658  
DRB5\*01:01:01v1\_STR1 ACTAAATTCAGGCTGATGACACTGTGAGGCCTCATGGCCAGCTGTGCTGGAGGCCCTGGT 2668  
DRB5\*01:08Ne1 ACTAAATTCAGGCTGATGACACTGTGAGGCCTCATGGCCAGCTGTGCTGGAGGCCCTGGT 2692  
DRB5\*01:03e1 ACTAAATTCAGGCTGATGACACTGTGAGGCCTCATGGCCAGCTGTGCTGGAGGCCCTGGT 2694  
DRB5\*01:02e1 ACTAAATTCAGGCTGATGACACTGTGAGGCCTCATGGCCAGCTGTGCTGGAGGCCCTGGT 2700  
DRB5\*01:02e1\_STR1 ACTAAATTCAGGCTGATGACACTGTGAGGCCTCATGGCCAGCTGTGCTGGAGGCCCTGGT 2694

DRB5\*02:02e1\_STR1 CAAGGCCAGAGCCTGGGTTTACAGAGAAGCAGACAAACAGCCAAAAAGGGAGATTCACTC 2720  
DRB5\*02:02e1 CAAGGCCAGAGCCTGGGTTTACAGAGAAGCAGACAAACAGCCAAAAAGGGAGATTCACTC 2724  
DRB5\*02:03e1 CAAGGCCAGAGCCTGGGTTTACAGAGAAGCAGACAAACAGCCAAAAAGGGAGATTCACTC 2719  
DRB5\*01:01:01\_HGP CAAGGCCAGAGCCTGGGTTTACAGAGAAGCAGACAAACAGCCAAAAAGGGAGATTCACTC 2724  
DRB5\*01:01:01\_STR1 CAAGGCCAGAGCCTGGGTTTACAGAGAAGCAGACAAACAGCCAAAAAGGGAGATTCACTC 2720  
DRB5\*01:01:01v1 CAAGGCCAGAGCCTGGGTTTACAGAGAAGCAGACAAACAGCCAAAAAGGGAGATTCACTC 2718  
DRB5\*01:01:01v1\_STR1 CAAGGCCAGAGCCTGGGTTTACAGAGAAGCAGACAAACAGCCAAAAAGGGAGATTCACTC 2728  
DRB5\*01:08Ne1 CAAGGCCAGAGCCTGGGTTTACAGAGAAGCAGACAAACAGCCAAAAAGGGAGATTCACTC 2752  
DRB5\*01:03e1 CAAGGCCAGAGCCTGGGTTTACAGAGAAGCAGACAAACAGCCAAAAAGGGAGATTCACTC 2754  
DRB5\*01:02e1 CAAGGCCAGAGCCTGGGTTTACAGAGAAGCAGACAAACAGCCAAAAAGGGAGATTCACTC 2760  
DRB5\*01:02e1\_STR1 CAAGGCCAGAGCCTGGGTTTACAGAGAAGCAGACAAACAGCCAAAAAGGGAGATTCACTC 2754

DRB5\*02:02e1\_STR1 TGTCTTCCTGAGTCATTCCTCTACATTTCTCTCTAG | TTGAGCCTAAGGTGACTGT 2780  
DRB5\*02:02e1 TGTCTTCCTGAGTCATTCCTCTACATTTCTCTCTAG | TTGAGCCTAAGGTGACTGT 2784  
DRB5\*02:03e1 TGTCTTCCTGAGTCATTCCTCTACATTTCTCTCTAG | TTGAGCCTAAGGTGACTGT 2779  
DRB5\*01:01:01\_HGP TGTCTTCCTGAGTCATTCCTCTACATTTCTCTCTAG | TTGAGCCTAAGGTGACTGT 2784  
DRB5\*01:01:01\_STR1 TGTCTTCCTGAGTCATTCCTCTACATTTCTCTCTAG | TTGAGCCTAAGGTGACTGT 2780 EXON3  
DRB5\*01:01:01v1 TGTCTTCCTGAGTCATTCCTCTACATTTCTCTCTAG | TTGAGCCTAAGGTGACTGT 2778  
DRB5\*01:01:01v1\_STR1 TGTCTTCCTGAGTCATTCCTCTACATTTCTCTCTAG | TTGAGCCTAAGGTGACTGT 2788  
DRB5\*01:08Ne1 TGTCTTCCTGAGTCATTCCTCTACATTTCTCTCTAG | TTGAGCCTAAGGTGACTGT 2812  
DRB5\*01:03e1 TGTCTTCCTGAGTCATTCCTCTACATTTCTCTCTAG | TTGAGCCTAAGGTGACTGT 2814  
DRB5\*01:02e1 TGTCTTCCTGAGTCATTCCTCTACATTTCTCTCTAG | TTGAGCCTAAGGTGACTGT 2820  
DRB5\*01:02e1\_STR1 TGTCTTCCTGAGTCATTCCTCTACATTTCTCTCTAG | TTGAGCCTAAGGTGACTGT 2814

DRB5\*02:02e1\_STR1 GTATCCTGCAAGGACCCAGACCTTCAGCACCACAACCTCCTGGTCTGCTCTGTGAATGG 2840  
DRB5\*02:02e1 GTATCCTGCAAGGACCCAGACCTTCAGCACCACAACCTCCTGGTCTGCTCTGTGAATGG 2844  
DRB5\*02:03e1 GTATCCTGCAAGGACCCAGACCTTCAGCACCACAACCTCCTGGTCTGCTCTGTGAATGG 2839  
DRB5\*01:01:01\_HGP GTATCCTGCAAGGACCCAGACCTTCAGCACCACAACCTCCTGGTCTGCTCTGTGAATGG 2844  
DRB5\*01:01:01\_STR1 GTATCCTGCAAGGACCCAGACCTTCAGCACCACAACCTCCTGGTCTGCTCTGTGAATGG 2840 EXON3  
DRB5\*01:01:01v1 GTATCCTGCAAGGACCCAGACCTTCAGCACCACAACCTCCTGGTCTGCTCTGTGAATGG 2838  
DRB5\*01:01:01v1\_STR1 GTATCCTGCAAGGACCCAGACCTTCAGCACCACAACCTCCTGGTCTGCTCTGTGAATGG 2848  
DRB5\*01:08Ne1 GTATCCTGCAAGGACCCAGACCTTCAGCACCACAACCTCCTGGTCTGCTCTGTGAATGG 2872  
DRB5\*01:03e1 GTATCCTGCAAGGACCCAGACCTTCAGCACCACAACCTCCTGGTCTGCTCTGTGAATGG 2874

|                      |                                                               |      |
|----------------------|---------------------------------------------------------------|------|
| DRB5*01:02e1         | GTATCCTGCAAGGACCCAGACCTGCAGCACCACAACCTCCTGGTCTGCTGTGAATGG     | 2880 |
| DRB5*01:02e1_STR1    | GTATCCTGCAAGGACCCAGACCTGCAGCACCACAACCTCCTGGTCTGCTGTGAATGG     | 2874 |
| -----                |                                                               |      |
| DRB5*02:02e1_STR1    | TTTCTATCCAGGCAGCATTGAAGTCAGTGGTTCCGGAACGGCCAGGAAGAGAAGGCTGG   | 2900 |
| DRB5*02:02e1         | TTTCTATCCAGGCAGCATTGAAGTCAGTGGTTCCGGAACGGCCAGGAAGAGAAGGCTGG   | 2904 |
| DRB5*02:03e1         | TTTCTATCCAGGCAGCATTGAAGTCAGTGGTTCCGGAACGGCCAGGAAGAGAAGGCTGG   | 2899 |
| DRB5*01:01:01_HGP    | TTTCTATCCAGGCAGCATTGAAGTCAGTGGTTCCGGAACGGCCAGGAAGAGAAGGCTGG   | 2904 |
| DRB5*01:01:01_STR1   | TTTCTATCCAGGCAGCATTGAAGTCAGTGGTTCCGGAACGGCCAGGAAGAGAAGGCTGG   | 2900 |
| DRB5*01:01:01v1      | TTTCTATCCAGGCAGCATTGAAGTCAGTGGTTCCGGAACGGCCAGGAAGAGAAGGCTGG   | 2898 |
| DRB5*01:01:01v1_STR1 | TTTCTATCCAGGCAGCATTGAAGTCAGTGGTTCCGGAACGGCCAGGAAGAGAAGGCTGG   | 2908 |
| DRB5*01:08Ne1        | TTTCTATCCAGGCAGCATTGAAGTCAGTGGTTCCGGAACGGCCAGGAAGAGAAGGCTGG   | 2932 |
| DRB5*01:03e1         | TTTCTATCCAGGCAGCATTGAAGTCAGTGGTTCCGGAACGGCCAGGAAGAGAAGGCTGG   | 2934 |
| DRB5*01:02e1         | TTTCTATCCAGGCAGCATTGAAGTCAGTGGTTCCGGAACGGCCAGGAAGAGAAGGCTGG   | 2940 |
| DRB5*01:02e1_STR1    | TTTCTATCCAGGCAGCATTGAAGTCAGTGGTTCCGGAACGGCCAGGAAGAGAAGGCTGG   | 2934 |
| -----                |                                                               |      |
| DRB5*02:02e1_STR1    | GGTGGTGTCCACAGGCTGATTCAGAATGGAGACTGGACCTTCCAGATTCTGGTGATGCT   | 2960 |
| DRB5*02:02e1         | GGTGGTGTCCACAGGCTGATTCAGAATGGAGACTGGACCTTCCAGATTCTGGTGATGCT   | 2964 |
| DRB5*02:03e1         | GGTGGTGTCCACAGGCTGATTCAGAATGGAGACTGGACCTTCCAGATTCTGGTGATGCT   | 2959 |
| DRB5*01:01:01_HGP    | GGTGGTGTCCACAGGCTGATTCAGAATGGAGACTGGACCTTCCAGATTCTGGTGATGCT   | 2964 |
| DRB5*01:01:01_STR1   | GGTGGTGTCCACAGGCTGATTCAGAATGGAGACTGGACCTTCCAGATTCTGGTGATGCT   | 2960 |
| DRB5*01:01:01v1      | GGTGGTGTCCACAGGCTGATTCAGAATGGAGACTGGACCTTCCAGATTCTGGTGATGCT   | 2958 |
| DRB5*01:01:01v1_STR1 | GGTGGTGTCCACAGGCTGATTCAGAATGGAGACTGGACCTTCCAGATTCTGGTGATGCT   | 2968 |
| DRB5*01:08Ne1        | GGTGGTGTCCACAGGCTGATTCAGAATGGAGACTGGACCTTCCAGATTCTGGTGATGCT   | 2992 |
| DRB5*01:03e1         | GGTGGTGTCCACAGGCTGATTCAGAATGGAGACTGGACCTTCCAGATTCTGGTGATGCT   | 2994 |
| DRB5*01:02e1         | GGTGGTGTCCACAGGCTGATTCAGAATGGAGACTGGACCTTCCAGATTCTGGTGATGCT   | 3000 |
| DRB5*01:02e1_STR1    | GGTGGTGTCCACAGGCTGATTCAGAATGGAGACTGGACCTTCCAGATTCTGGTGATGCT   | 2994 |
| -----                |                                                               |      |
| DRB5*02:02e1_STR1    | GGAAACAGTTCCTCGAGTGGAGAGGTTTACACCTGCCAAGTGGAGCACCCAAGCGTGAC   | 3020 |
| DRB5*02:02e1         | GGAAACAGTTCCTCGAGTGGAGAGGTTTACACCTGCCAAGTGGAGCACCCAAGCGTGAC   | 3024 |
| DRB5*02:03e1         | GGAAACAGTTCCTCGAGTGGAGAGGTTTACACCTGCCAAGTGGAGCACCCAAGCGTGAC   | 3019 |
| DRB5*01:01:01_HGP    | GGAAACAGTTCCTCGAGTGGAGAGGTTTACACCTGCCAAGTGGAGCACCCAAGCGTGAC   | 3024 |
| DRB5*01:01:01_STR1   | GGAAACAGTTCCTCGAGTGGAGAGGTTTACACCTGCCAAGTGGAGCACCCAAGCGTGAC   | 3020 |
| DRB5*01:01:01v1      | GGAAACAGTTCCTCGAGTGGAGAGGTTTACACCTGCCAAGTGGAGCACCCAAGCGTGAC   | 3018 |
| DRB5*01:01:01v1_STR1 | GGAAACAGTTCCTCGAGTGGAGAGGTTTACACCTGCCAAGTGGAGCACCCAAGCGTGAC   | 3028 |
| DRB5*01:08Ne1        | GG.....AGAGGTTTACACCTGCCAAGTGGAGCACCCAAGCGTGAC                | 3033 |
| DRB5*01:03e1         | GGAAACAGTTCCTCGAGTGGAGAGGTTTACACCTGCCAAGTGGAGCACCCAAGCGTGAC   | 3054 |
| DRB5*01:02e1         | GGAAACAGTTCCTCGAGTGGAGAGGTTTACACCTGCCAAGTGGAGCACCCAAGCGTGAC   | 3060 |
| DRB5*01:02e1_STR1    | GGAAACAGTTCCTCGAGTGGAGAGGTTTACACCTGCCAAGTGGAGCACCCAAGCGTGAC   | 3054 |
| -----                |                                                               |      |
| DRB5*02:02e1_STR1    | GAGCCCTCTCACAGTGGAAATGGA                                      | 3080 |
| DRB5*02:02e1         | GAGCCCTCTCACAGTGGAAATGGA                                      | 3084 |
| DRB5*02:03e1         | GAGCCCTCTCACAGTGGAAATGGA                                      | 3079 |
| DRB5*01:01:01_HGP    | GAGCCCTCTCACAGTGGAAATGGA                                      | 3084 |
| DRB5*01:01:01_STR1   | GAGCCCTCTCACAGTGGAAATGGA                                      | 3080 |
| DRB5*01:01:01v1      | GAGCCCTCTCACAGTGGAAATGGA                                      | 3078 |
| DRB5*01:01:01v1_STR1 | GAGCCCTCTCACAGTGGAAATGGA                                      | 3088 |
| DRB5*01:08Ne1        | GAGCCCTCTCACAGTGGAAATGGA                                      | 3093 |
| DRB5*01:03e1         | GAGCCCTCTCACAGTGGAAATGGA                                      | 3114 |
| DRB5*01:02e1         | GAGCCCTCTCACAGTGGAAATGGA                                      | 3120 |
| DRB5*01:02e1_STR1    | GAGCCCTCTCACAGTGGAAATGGA                                      | 3114 |
| -----                |                                                               |      |
| DRB5*02:02e1_STR1    | CAAGAAGCAAACCTTTACTAATCCCTGAGTGTGAGGTTTCTCATCTCCCACATCCTATTTT | 3140 |
| DRB5*02:02e1         | CAAGAAGCAAACCTTTACTAATCCCTGAGTGTGAGGTTTCTCATCTCCCACATCCTATTTT | 3144 |
| DRB5*02:03e1         | CAAGAAGCAAACCTTTACTAATCCCTGAGTGTGAGGTTTCTCATCTCCCACATCCTATTTT | 3139 |
| DRB5*01:01:01_HGP    | CAAGAAGCAAACCTTTACTAATCCCTGAGTGTGAGGTTTCTCATCTCCCACATCCTATTTT | 3144 |
| DRB5*01:01:01_STR1   | CAAGAAGCAAACCTTTACTAATCCCTGAGTGTGAGGTTTCTCATCTCCCACATCCTATTTT | 3140 |
| DRB5*01:01:01v1      | CAAGAAGCAAACCTTTACTAATCCCTGAGTGTGAGGTTTCTCATCTCCCACATCCTATTTT | 3138 |
| DRB5*01:01:01v1_STR1 | CAAGAAGCAAACCTTTACTAATCCCTGAGTGTGAGGTTTCTCATCTCCCACATCCTATTTT | 3148 |
| DRB5*01:08Ne1        | CAAGAAGCAAACCTTTACTAATCCCTGAGTGTGAGGTTTCTCATCTCCCACATCCTATTTT | 3153 |
| DRB5*01:03e1         | CAAGAAGCAAACCTTTACTAATCCCTGAGTGTGAGGTTTCTCATCTCCCACATCCTATTTT | 3174 |
| DRB5*01:02e1         | CAAGAAGCAAACCTTTACTAATCCCTGAGTGTGAGGTTTCTCATCTCCCACATCCTATTTT | 3180 |
| DRB5*01:02e1_STR1    | CAAGAAGCAAACCTTTACTAATCCCTGAGTGTGAGGTTTCTCATCTCCCACATCCTATTTT | 3174 |
| -----                |                                                               |      |
| DRB5*02:02e1_STR1    | CATTTGCTCCATGTTCTCATCTCCGTTAGCACAGGTCACCTGGGGGTAGCCCTGTATAGTT | 3200 |
| DRB5*02:02e1         | CATTTGCTCCATGTTCTCATCTCCGTTAGCACAGGTCACCTGGGGGTAGCCCTGTATAGTT | 3204 |
| DRB5*02:03e1         | CATTTGCTCCATGTTCTCATCTCCGTTAGCACAGGTCACCTGGGGGTAGCCCTGTATAGTT | 3199 |
| DRB5*01:01:01_HGP    | CATTTGCTCCATGTTCTCATCTCCATTAGCACAGGTCACCTGGGGGTAGCCCTGTATAGTT | 3204 |
| DRB5*01:01:01_STR1   | CATTTGCTCCATGTTCTCATCTCCATTAGCACAGGTCACCTGGGGGTAGCCCTGTATAGTT | 3200 |
| DRB5*01:01:01v1      | CATTTGCTCCATGTTCTCATCTCCATTAGCACAGGTCACCTGGGGGTAGCCCTGTATAGTT | 3198 |
| DRB5*01:01:01v1_STR1 | CATTTGCTCCATGTTCTCATCTCCATTAGCACAGGTCACCTGGGGGTAGCCCTGTATAGTT | 3208 |
| DRB5*01:08Ne1        | CATTTGCTCCATGTTCTCATCTCCATTAGCACAGGTCACCTGGGGGTAGCCCTGTATAGTT | 3213 |
| DRB5*01:03e1         | CATTTGCTCCATGTTCTCATCTCCATTAGCACAGGTCACCTGGGGGTAGCCCTGTATAGTT | 3234 |
| DRB5*01:02e1         | CATTTGCTCCATGTTCTCATCTCCATTAGCACAGGTCACCTGGGGGTAGCCCTGTATAGTT | 3240 |
| DRB5*01:02e1_STR1    | CATTTGCTCCATGTTCTCATCTCCATTAGCACAGGTCACCTGGGGGTAGCCCTGTATAGTT | 3234 |
| -----                |                                                               |      |
| DRB5*02:02e1_STR1    | TCTAGAAACACCTGTATCCTCTGGGGAAGCAGTCATTCTGGCAGGAAGGAGAGGCTGTC   | 3260 |
| DRB5*02:02e1         | TCTAGAAACACCTGTATCCTCTGGGGAAGCAGTCATTCTGGCAGGAAGGAGAGGCTGTC   | 3264 |
| DRB5*02:03e1         | TCTAGAAACACCTGTATCCTCTGGGGAAGCAGTCATTCTGGCAGGAAGGAGAGGCTGTC   | 3259 |
| DRB5*01:01:01_HGP    | TCTAGAAACACCTGTATCCTCTGGGGAAGCAGTCATTCTGGCAGGAAGGAGAGGCTGTC   | 3264 |
| DRB5*01:01:01_STR1   | TCTAGAAACACCTGTATCCTCTGGGGAAGCAGTCATTCTGGCAGGAAGGAGAGGCTGTC   | 3260 |
| DRB5*01:01:01v1      | TCTAGAAACACCTGTATCCTCTGGGGAAGCAGTCATTCTGGCAGGAAGGAGAGGCTGTC   | 3258 |
| DRB5*01:01:01v1_STR1 | TCTAGAAACACCTGTATCCTCTGGGGAAGCAGTCATTCTGGCAGGAAGGAGAGGCTGTC   | 3268 |

|                      |                                                                |      |
|----------------------|----------------------------------------------------------------|------|
| DRB5*01:08Ne1        | TCTAGAAACACCTGTATCCTCTGGGGAAGCAGTCATTCCCTGGCAGGAAGGAGAGGGCTGTC | 3273 |
| DRB5*01:03e1         | TCTAGAAACACCTGTATCCTCTGGGGAAGCAGTCATTCCCTGGCAGGAAGGAGAGGGCTGTC | 3294 |
| DRB5*01:02e1         | TCTAGAAACACCTGTATCCTCTGGGGAAGCAGTCATTCCCTGGCAGGAAGGAGAGGGCTGTC | 3300 |
| DRB5*01:02e1_STR1    | TCTAGAAACACCTGTATCCTCTGGGGAAGCAGTCATTCCCTGGCAGGAAGGAGAGGGCTGTC | 3294 |
| -----                |                                                                |      |
| DRB5*02:02e1_STR1    | CCTGTTTTGAACCTCCCATGATGTCACAGGTCAGGGTCACCCCTCTCCCAGGGCTCCA     | 3320 |
| DRB5*02:02e1         | CCTGTTTTGAACCTCCCATGATGTCACAGGTCAGGGTCACCCCTCTCCCAGGGCTCCA     | 3324 |
| DRB5*02:03e1         | CCTGTTTTGAACCTCCCATGATGTCACAGGTCAGGGTCACCCCTCTCCCAGGGCTCCA     | 3319 |
| DRB5*01:01:01_HGP    | CCTGTTTTGAACCTCCCATGATGTCACAGGTCAGGGTCACCCCTCTCCCAGGGCTCCA     | 3324 |
| DRB5*01:01:01_STR1   | CCTGTTTTGAACCTCCCATGATGTCACAGGTCAGGGTCACCCCTCTCCCAGGGCTCCA     | 3320 |
| DRB5*01:01:01v1      | CCTGTTTTGAACCTCCCATGATGTCACAGGTCAGGGTCACCCCTCTCCCAGGGCTCCA     | 3318 |
| DRB5*01:01:01v1_STR1 | CCTGTTTTGAACCTCCCATGATGTCACAGGTCAGGGTCACCCCTCTCCCAGGGCTCCA     | 3328 |
| DRB5*01:08Ne1        | CCTGTTTTGAACCTCCCATGATGTCACAGGTCAGGGTCACCCCTCTCCCAGGGCTCCA     | 3333 |
| DRB5*01:03e1         | CCTGTTTTGAACCTCCCATGATGTCACAGGTCAGGGTCACCCCTCTCCCAGGGCTCCA     | 3354 |
| DRB5*01:02e1         | CCTGTTTTGAACCTCCCATGATGTCACAGGTCAGGGTCACCCCTCTCCCAGGGCTCCA     | 3360 |
| DRB5*01:02e1_STR1    | CCTGTTTTGAACCTCCCATGATGTCACAGGTCAGGGTCACCCCTCTCCCAGGGCTCCA     | 3354 |
| -----                |                                                                |      |
| DRB5*02:02e1_STR1    | GACCCCTGCCTCTGGGCTCGAGACTGTGTTTCTGGTGTCTGTGATCTGAGTTATTTGTTGT  | 3380 |
| DRB5*02:02e1         | GACCCCTGCCTCTGGGCTCGAGACTGTGTTTCTGGTGTCTGTGATCTGAGTTATTTGTTGT  | 3384 |
| DRB5*02:03e1         | GACCCCTGCCTCTGGGCTCGAGACTGTGTTTCTGGTGTCTGTGATCTGAGTTATTTGTTGT  | 3379 |
| DRB5*01:01:01_HGP    | GACCCCTGCCTCTGGGCTCGAGACTGTGTTTCTGGTGTCTGTGATCTGAGTTATTTGTTGT  | 3384 |
| DRB5*01:01:01_STR1   | GACCCCTGCCTCTGGGCTCGAGACTGTGTTTCTGGTGTCTGTGATCTGAGTTATTTGTTGT  | 3380 |
| DRB5*01:01:01v1      | GACCCCTGCCTCTGGGCTCGAGACTGTGTTTCTGGTGTCTGTGATCTGAGTTATTTGTTGT  | 3378 |
| DRB5*01:01:01v1_STR1 | GACCCCTGCCTCTGGGCTCGAGACTGTGTTTCTGGTGTCTGTGATCTGAGTTATTTGTTGT  | 3388 |
| DRB5*01:08Ne1        | GACCCCTGCCTCTGGGCTCGAGACTGTGTTTCTGGTGTCTGTGATCTGAGTTATTTGTTGT  | 3393 |
| DRB5*01:03e1         | GACCCCTGCCTCTGGGCTCGAGACTGTGTTTCTGGTGTCTGTGATCTGAGTTATTTGTTGT  | 3414 |
| DRB5*01:02e1         | GACCCCTGCCTCTGGGCTCGAGACTGTGTTTCTGGTGTCTGTGATCTGAGTTATTTGTTGT  | 3420 |
| DRB5*01:02e1_STR1    | GACCCCTGCCTCTGGGCTCGAGACTGTGTTTCTGGTGTCTGTGATCTGAGTTATTTGTTGT  | 3414 |
| -----                |                                                                |      |
| DRB5*02:02e1_STR1    | GATCTGGGAAGAGGAGAAGTGTAGGGCCCTTCCGACATGAGGGGAGTCCAATCTCAGCT    | 3440 |
| DRB5*02:02e1         | GATCTGGGAAGAGGAGAAGTGTAGGGCCCTTCCGACATGAGGGGAGTCCAATCTCAGCT    | 3444 |
| DRB5*02:03e1         | GATCTGGGAAGAGGAGAAGTGTAGGGCCCTTCCGACATGAGGGGAGTCCAATCTCAGCT    | 3439 |
| DRB5*01:01:01_HGP    | GATCTGGGAAGAGGAGAAGTGTAGGGCCCTTCCGACATGAGGGGAGTCCAATCTCAGCT    | 3444 |
| DRB5*01:01:01_STR1   | GATCTGGGAAGAGGAGAAGTGTAGGGCCCTTCCGACATGAGGGGAGTCCAATCTCAGCT    | 3440 |
| DRB5*01:01:01v1      | GATCTGGGAAGAGGAGAAGTGTAGGGCCCTTCCGACATGAGGGGAGTCCAATCTCAGCT    | 3438 |
| DRB5*01:01:01v1_STR1 | GATCTGGGAAGAGGAGAAGTGTAGGGCCCTTCCGACATGAGGGGAGTCCAATCTCAGCT    | 3448 |
| DRB5*01:08Ne1        | GATCTGGGAAGAGGAGAAGTGTAGGGCCCTTCCGACATGAGGGGAGTCCAATCTCAGCT    | 3453 |
| DRB5*01:03e1         | GATCTGGGAAGAGGAGAAGTGTAGGGCCCTTCCGACATGAGGGGAGTCCAATCTCAGCT    | 3474 |
| DRB5*01:02e1         | GATCTGGGAAGAGGAGAAGTGTAGGGCCCTTCCGACATGAGGGGAGTCCAATCTCAGCT    | 3470 |
| DRB5*01:02e1_STR1    | GATCTGGGAAGAGGAGAAGTGTAGGGCCCTTCCGACATGAGGGGAGTCCAATCTCAGCT    | 3474 |
| -----                |                                                                |      |
| DRB5*02:02e1_STR1    | CTGCCTTTTATTAGTCTGTCACTCTAGACAAACTATTTAACCTCATTGAGTCTCAGGCT    | 3500 |
| DRB5*02:02e1         | CTGCCTTTTATTAGTCTGTCACTCTAGACAAACTATTTAACCTCATTGAGTCTCAGGCT    | 3504 |
| DRB5*02:03e1         | CTGCCTTTTATTAGTCTGTCACTCTAGACAAACTATTTAACCTCATTGAGTCTCAGGCT    | 3499 |
| DRB5*01:01:01_HGP    | CTGCCTTTTATTAGTCTGTCACTCTAGACAAACTATTTAACCTCATTGAGTCTCAGGCT    | 3504 |
| DRB5*01:01:01_STR1   | CTGCCTTTTATTAGTCTGTCACTCTAGACAAACTATTTAACCTCATTGAGTCTCAGGCT    | 3500 |
| DRB5*01:01:01v1      | CTGCCTTTTATTAGTCTGTCACTCTAGACAAACTATTTAACCTCATTGAGTCTCAGGCT    | 3498 |
| DRB5*01:01:01v1_STR1 | CTGCCTTTTATTAGTCTGTCACTCTAGACAAACTATTTAACCTCATTGAGTCTCAGGCT    | 3508 |
| DRB5*01:08Ne1        | CTGCCTTTTATTAGTCTGTCACTCTAGACAAACTATTTAACCTCATTGAGTCTCAGGCT    | 3513 |
| DRB5*01:03e1         | CTGCCTTTTATTAGTCTGTCACTCTAGACAAACTATTTAACCTCATTGAGTCTCAGGCT    | 3534 |
| DRB5*01:02e1         | CTGCCTTTTATTAGTCTGTCACTCTAGACAAACTATTTAACCTCATTGAGTCTCAGGCT    | 3540 |
| DRB5*01:02e1_STR1    | CTGCCTTTTATTAGTCTGTCACTCTAGACAAACTATTTAACCTCATTGAGTCTCAGGCT    | 3534 |
| -----                |                                                                |      |
| DRB5*02:02e1_STR1    | TTCTGTTTATCAGATGTTGAAGCCGTGCCTTACATCAGGGCTGTAATATTAGAATGAATT   | 3560 |
| DRB5*02:02e1         | TTCTGTTTATCAGATGTTGAAGCCGTGCCTTACATCAGGGCTGTAATATTAGAATGAATT   | 3564 |
| DRB5*02:03e1         | TTCTGTTTATCAGATGTTGAAGCCGTGCCTTACATCAGGGCTGTAATATTAGAATGAATT   | 3559 |
| DRB5*01:01:01_HGP    | TTCTGTTTATCAGATGTTGAAGCCGTGCCTTACATCAGGGCTGTAATATTAGAATGAATT   | 3564 |
| DRB5*01:01:01_STR1   | TTCTGTTTATCAGATGTTGAAGCCGTGCCTTACATCAGGGCTGTAATATTAGAATGAATT   | 3560 |
| DRB5*01:01:01v1      | TTCTGTTTATCAGATGTTGAAGCCGTGCCTTACATCAGGGCTGTAATATTAGAATGAATT   | 3558 |
| DRB5*01:01:01v1_STR1 | TTCTGTTTATCAGATGTTGAAGCCGTGCCTTACATCAGGGCTGTAATATTAGAATGAATT   | 3573 |
| DRB5*01:08Ne1        | TTCTGTTTATCAGATGTTGAAGCCGTGCCTTACATCAGGGCTGTAATATTAGAATGAATT   | 3573 |
| DRB5*01:03e1         | TTCTGTTTATCAGATGTTGAAGCCGTGCCTTACATCAGGGCTGTAATATTAGAATGAATT   | 3594 |
| DRB5*01:02e1         | TTCTGTTTATCAGATGTTGAAGCCGTGCCTTACATCAGGGCTGTAATATTAGAATGAATT   | 3600 |
| DRB5*01:02e1_STR1    | TTCTGTTTATCAGATGTTGAAGCCGTGCCTTACATCAGGGCTGTAATATTAGAATGAATT   | 3594 |
| -----                |                                                                |      |
| DRB5*02:02e1_STR1    | TGATCCCTGAAACTTGTAACCTGTTTCAGTGTGATTTGAAAACCTTTTTTTTCCAGAAAT   | 3620 |
| DRB5*02:02e1         | TGATCCCTGAAACTTGTAACCTGTTTCAGTGTGATTTGAAAACCTTTTTTTTCCAGAAAT   | 3624 |
| DRB5*02:03e1         | TGATCCCTGAAACTTGTAACCTGTTTCAGTGTGATTTGAAAACCTTTTTTTTCCAGAAAT   | 3619 |
| DRB5*01:01:01_HGP    | TGATCCCTGAAACTTGTAACCTGTTTCAGTGTGATTTGAAAACCTTTTTTTTCCAGAAAT   | 3624 |
| DRB5*01:01:01_STR1   | TGATCCCTGAAACTTGTAACCTGTTTCAGTGTGATTTGAAAACCTTTTTTTTCCAGAAAT   | 3620 |
| DRB5*01:01:01v1      | TGATCCCTGAAACTTGTAACCTGTTTCAGTGTGATTTGAAAACCTTTTTTTTCCAGAAAT   | 3618 |
| DRB5*01:01:01v1_STR1 | TGATCCCTGAAACTTGTAACCTGTTTCAGTGTGATTTGAAAACCTTTTTTTTCCAGAAAT   | 3628 |
| DRB5*01:08Ne1        | TGATCCCTGAAACTTGTAACCTGTTTCAGTGTGATTTGAAAACCTTTTTTTTCCAGAAAT   | 3633 |
| DRB5*01:03e1         | TGATCCCTGAAACTTGTAACCTGTTTCAGTGTGATTTGAAAACCTTTTTTTTCCAGAAAT   | 3654 |
| DRB5*01:02e1         | TGATCCCTGAAACTTGTAACCTGTTTCAGTGTGATTTGAAAACCTTTTTTTTCCAGAAAT   | 3660 |
| DRB5*01:02e1_STR1    | TGATCCCTGAAACTTGTAACCTGTTTCAGTGTGATTTGAAAACCTTTTTTTTCCAGAAAT   | 3654 |
| -----                |                                                                |      |
| DRB5*02:02e1_STR1    | GGCTAGTTATTTTAGTCTTACAGAGCAGCCTTCTCCCCATTTTCAAAGCTATGAATAT     | 3680 |
| DRB5*02:02e1         | GGCTAGTTATTTTAGTCTTACAGAGCAGCCTTCTCCCCATTTTCAAAGCTATGAATAT     | 3684 |
| DRB5*02:03e1         | GGCTAGTTATTTTAGTCTTACAGAGCAGCCTTCTCCCCATTTTCAAAGCTATGAATAT     | 3679 |
| DRB5*01:01:01_HGP    | GGCTAGTTATTTTAGTCTTACAGAGCAGCCTTCTCCCCATTTTCAAAGCTATGAATAT     | 3684 |
| DRB5*01:01:01_STR1   | GGCTAGTTATTTTAGTCTTACAGAGCAGCCTTCTCCCCATTTTCAAAGCTATGAATAT     | 3680 |

|                      |                                                                  |      |
|----------------------|------------------------------------------------------------------|------|
| DRB5*01:01:01v1      | GGCTAGTTATTTTGTCTTACAGAGCAGCCTTCTTCCCATTTCCAAAGCTATGAATAT        | 3678 |
| DRB5*01:01:01v1_STR1 | GGCTAGTTATTTTGTCTTACAGAGCAGCCTTCTTCCCATTTCCAAAGCTATGAATAT        | 3688 |
| DRB5*01:08Ne1        | GGCTAGTTATTTTGTCTTACAGAGCAGCCTTCTTCCCATTTCCAAAGCTATGAATAT        | 3693 |
| DRB5*01:03e1         | GGCTAGTTATTTTGTCTTACAGAGCAGCCTTCTTCCCATTTCCAAAGCTATGAATAT        | 3714 |
| DRB5*01:02e1         | GGCTAGTTATTTTGTCTTACAGAGCAGCCTTCTTCCCATTTCCAAAGCTATGAATAT        | 3720 |
| DRB5*01:02e1_STR1    | GGCTAGTTATTTTGTCTTACAGAGCAGCCTTCTTCCCATTTCCAAAGCTATGAATAT        | 3714 |
| -----                |                                                                  |      |
| DRB5*02:02e1_STR1    | TGCAGGGTCTCAATTA AAAAGGTTCAATTTGGGATAAAAATCACTAAACCTGGCTTCCTC    | 3740 |
| DRB5*02:02e1         | TGCAGGGTCTCAATTA AAAAGGTTCAATTTGGGATAAAAATCACTAAACCTGGCTTCCTC    | 3744 |
| DRB5*02:03e1         | TGCAGGGTCTCAATTA AAAAGGTTCAATTTGGGATAAAAATCACTAAACCTGGCTTCCTC    | 3739 |
| DRB5*01:01:01_HGP    | TGCAGGGTCTCAATTA AAAAGGTTCAATTTGGGATAAAAATCACTAAACCTGGCTTCCTC    | 3744 |
| DRB5*01:01:01_STR1   | TGCAGGGTCTCAATTA AAAAGGTTCAATTTGGGATAAAAATCACTAAACCTGGCTTCCTC    | 3740 |
| DRB5*01:01:01v1      | TGCAGGGTCTCAATTA AAAAGGTTCAATTTGGGATAAAAATCACTAAACCTGGCTTCCTC    | 3738 |
| DRB5*01:01:01v1_STR1 | TGCAGGGTCTCAATTA AAAAGGTTCAATTTGGGATAAAAATCACTAAACCTGGCTTCCTC    | 3748 |
| DRB5*01:08Ne1        | TGCAGGGTCTCAATTA AAAAGGTTCAATTTGGGATAAAAATCACTAAACCTGGCTTCCTC    | 3753 |
| DRB5*01:03e1         | TGCAGGGTCTCAATTA AAAAGGTTCAATTTGGGATAAAAATCACTAAACCTGGCTTCCTC    | 3774 |
| DRB5*01:02e1         | TGCAGGGTCTCAATTA AAAAGGTTCAATTTGGGATAAAAATCACTAAACCTGGCTTCCTC    | 3780 |
| DRB5*01:02e1_STR1    | TGCAGGGTCTCAATTA AAAAGGTTCAATTTGGGATAAAAATCACTAAACCTGGCTTCCTC    | 3774 |
| -----                |                                                                  |      |
| DRB5*02:02e1_STR1    | TCCCAG   GAGCACAGTCTGAATCTGCACAGAGCAAGATGCTGAGTGGAAATCGGGGGCTTTG | 3800 |
| DRB5*02:02e1         | TCCCAG   GAGCACAGTCTGAATCTGCACAGAGCAAGATGCTGAGTGGAAATCGGGGGCTTTG | 3804 |
| DRB5*02:03e1         | TCCCAG   GAGCACAGTCTGAATCTGCACAGAGCAAGATGCTGAGTGGAAATCGGGGGCTTTG | 3799 |
| DRB5*01:01:01_HGP    | TCCCAG   GAGCACAGTCTGAATCTGCACAGAGCAAGATGCTGAGTGGAGTTCGGGGCTTTG  | 3804 |
| DRB5*01:01:01_STR1   | TCCCAG   GAGCACAGTCTGAATCTGCACAGAGCAAGATGCTGAGTGGAGTTCGGGGCTTTG  | 3800 |
| DRB5*01:01:01v1      | TCCCAG   GAGCACAGTCTGAATCTGCACAGAGCAAGATGCTGAGTGGAGTTCGGGGCTTTG  | 3798 |
| DRB5*01:01:01v1_STR1 | TCCCAG   GAGCACAGTCTGAATCTGCACAGAGCAAGATGCTGAGTGGAGTTCGGGGCTTTG  | 3808 |
| DRB5*01:08Ne1        | TCCCAG   GAGCACAGTCTGAATCTGCACAGAGCAAGATGCTGAGTGGAGTTCGGGGCTTTG  | 3813 |
| DRB5*01:03e1         | TCCCAG   GAGCACAGTCTGAATCTGCACAGAGCAAGATGCTGAGTGGAGTTCGGGGCTTTG  | 3834 |
| DRB5*01:02e1         | TCCCAG   GAGCACAGTCTGAATCTGCACAGAGCAAGATGCTGAGTGGAGTTCGGGGCTTTG  | 3840 |
| DRB5*01:02e1_STR1    | TCCCAG   GAGCACAGTCTGAATCTGCACAGAGCAAGATGCTGAGTGGAGTTCGGGGCTTTG  | 3834 |
| -----                |                                                                  |      |
| DRB5*02:02e1_STR1    | TGCTGGGCTGCTCTTCTTGGGGCCGGGCTATTTCATCTACTTCAAGAAATCAGAAAG   GTG  | 3860 |
| DRB5*02:02e1         | TGCTGGGCTGCTCTTCTTGGGGCCGGGCTATTTCATCTACTTCAAGAAATCAGAAAG   GTG  | 3864 |
| DRB5*02:03e1         | TGCTGGGCTGCTCTTCTTGGGGCCGGGCTATTTCATCTACTTCAAGAAATCAGAAAG   GTG  | 3859 |
| DRB5*01:01:01_HGP    | TGCTGGGCTGCTCTTCTTGGGGCCGGGCTATTTCATCTACTTCAAGAAATCAGAAAG   GTG  | 3864 |
| DRB5*01:01:01_STR1   | TGCTGGGCTGCTCTTCTTGGGGCCGGGCTATTTCATCTACTTCAAGAAATCAGAAAG   GTG  | 3860 |
| DRB5*01:01:01v1      | TGCTGGGCTGCTCTTCTTGGGGCCGGGCTATTTCATCTACTTCAAGAAATCAGAAAG   GTG  | 3858 |
| DRB5*01:01:01v1_STR1 | TGCTGGGCTGCTCTTCTTGGGGCCGGGCTATTTCATCTACTTCAAGAAATCAGAAAG   GTG  | 3868 |
| DRB5*01:08Ne1        | TGCTGGGCTGCTCTTCTTGGGGCCGGGCTATTTCATCTACTTCAAGAAATCAGAAAG   GTG  | 3873 |
| DRB5*01:03e1         | TGCTGGGCTGCTCTTCTTGGGGCCGGGCTATTTCATCTACTTCAAGAAATCAGAAAG   GTG  | 3894 |
| DRB5*01:02e1         | TGCTGGGCTGCTCTTCTTGGGGCCGGGCTATTTCATCTACTTCAAGAAATCAGAAAG   GTG  | 3900 |
| DRB5*01:02e1_STR1    | TGCTGGGCTGCTCTTCTTGGGGCCGGGCTATTTCATCTACTTCAAGAAATCAGAAAG   GTG  | 3894 |
| -----                |                                                                  |      |
| DRB5*02:02e1_STR1    | AGGAGCCTTTGGTAGCGGCTCTCCATAGACTTTTCCAGAGGAGGAAATAGGGCTTTGC       | 3920 |
| DRB5*02:02e1         | AGGAGCCTTTGGTAGCGGCTCTCCATAGACTTTTCCAGAGGAGGAAATAGGGCTTTGC       | 3924 |
| DRB5*02:03e1         | AGGAGCCTTTGGTAGCGGCTCTCCATAGACTTTTCCAGAGGAGGAAATAGGGCTTTGC       | 3919 |
| DRB5*01:01:01_HGP    | AGGAGCCTTTGGTAGCGGCTCTCCATAGACTTTTCCAGAGGAGGAAATAGGGCTTTGC       | 3924 |
| DRB5*01:01:01_STR1   | AGGAGCCTTTGGTAGCGGCTCTCCATAGACTTTTCCAGAGGAGGAAATAGGGCTTTGC       | 3920 |
| DRB5*01:01:01v1      | AGGAGCCTTTGGTAGCGGCTCTCCATAGACTTTTCCAGAGGAGGAAATAGGGCTTTGC       | 3918 |
| DRB5*01:01:01v1_STR1 | AGGAGCCTTTGGTAGCGGCTCTCCATAGACTTTTCCAGAGGAGGAAATAGGGCTTTGC       | 3928 |
| DRB5*01:08Ne1        | AGGAGCCTTTGGTAGCGGCTCTCCATAGACTTTTCCAGAGGAGGAAATAGGGCTTTGC       | 3933 |
| DRB5*01:03e1         | AGGAGCCTTTGGTAGCGGCTCTCCATAGACTTTTCCAGAGGAGGAAATAGGGCTTTGC       | 3954 |
| DRB5*01:02e1         | AGGAGCCTTTGGTAGCGGCTCTCCATAGACTTTTCCAGAGGAGGAAATAGGGCTTTGC       | 3960 |
| DRB5*01:02e1_STR1    | AGGAGCCTTTGGTAGCGGCTCTCCATAGACTTTTCCAGAGGAGGAAATAGGGCTTTGC       | 3954 |
| -----                |                                                                  |      |
| DRB5*02:02e1_STR1    | TGAGGTTAGTTCTCAGTATATGAGTGGCCCTGGATAAAGCCTTTCTTTCCACAAATGACC     | 3980 |
| DRB5*02:02e1         | TGAGGTTAGTTCTCAGTATATGAGTGGCCCTGGATAAAGCCTTTCTTTCCACAAATGACC     | 3984 |
| DRB5*02:03e1         | TGAGGTTAGTTCTCAGTATATGAGTGGCCCTGGATAAAGCCTTTCTTTCCACAAATGACC     | 3979 |
| DRB5*01:01:01_HGP    | TGAGGTTAGTTCTCAGTATATGAGTGGCCCTGGATAAAGCCTTTCTTTCCACAAATGACC     | 3984 |
| DRB5*01:01:01_STR1   | TGAGGTTAGTTCTCAGTATATGAGTGGCCCTGGATAAAGCCTTTCTTTCCACAAATGACC     | 3980 |
| DRB5*01:01:01v1      | TGAGGTTAGTTCTCAGTATATGAGTGGCCCTGGATAAAGCCTTTCTTTCCACAAATGACC     | 3978 |
| DRB5*01:01:01v1_STR1 | TGAGGTTAGTTCTCAGTATATGAGTGGCCCTGGATAAAGCCTTTCTTTCCACAAATGACC     | 3988 |
| DRB5*01:08Ne1        | TGAGGTTAGTTCTCAGTATATGAGTGGCCCTGGATAAAGCCTTTCTTTCCACAAATGACC     | 3993 |
| DRB5*01:03e1         | TGAGGTTAGTTCTCAGTATATGAGTGGCCCTGGATAAAGCCTTTCTTTCCACAAATGACC     | 4014 |
| DRB5*01:02e1         | TGAGGTTAGTTCTCAGTATATGAGTGGCCCTGGATAAAGCCTTTCTTTCCACAAATGACC     | 4020 |
| DRB5*01:02e1_STR1    | TGAGGTTAGTTCTCAGTATATGAGTGGCCCTGGATAAAGCCTTTCTTTCCACAAATGACC     | 4014 |
| -----                |                                                                  |      |
| DRB5*02:02e1_STR1    | TCCAATGCCCTGCTAATCCAGAAATCATTAATGCATGGTTACTATGTCAAAGCATAATA      | 4040 |
| DRB5*02:02e1         | TCCAATGCCCTGCTAATCCAGAAATCATTAATGCATGGTTACTATGTCAAAGCATAATA      | 4044 |
| DRB5*02:03e1         | TCCAATGCCCTGCTAATCCAGAAATCATTAATGCATGGTTACTATGTCAAAGCATAATA      | 4039 |
| DRB5*01:01:01_HGP    | TCCAATGCCCTGCTAATCCAGAAATCATTAATGCATGGTTACTATGTCAAAGCATAATA      | 4044 |
| DRB5*01:01:01_STR1   | TCCAATGCCCTGCTAATCCAGAAATCATTAATGCATGGTTACTATGTCAAAGCATAATA      | 4040 |
| DRB5*01:01:01v1      | TCCAATGCCCTGCTAATCCAGAAATCATTAATGCATGGTTACTATGTCAAAGCATAATA      | 4038 |
| DRB5*01:01:01v1_STR1 | TCCAATGCCCTGCTAATCCAGAAATCATTAATGCATGGTTACTATGTCAAAGCATAATA      | 4048 |
| DRB5*01:08Ne1        | TCCAATGCCCTGCTAATCCAGAAATCATTAATGCATGGTTACTATGTCAAAGCATAATA      | 4053 |
| DRB5*01:03e1         | TCCAATGCCCTGCTAATCCAGAAATCATTAATGCATGGTTACTATGTCAAAGCATAATA      | 4074 |
| DRB5*01:02e1         | TCCAATGCCCTGCTAATCCAGAAATCATTAATGCATGGTTACTATGTCAAAGCATAATA      | 4080 |
| DRB5*01:02e1_STR1    | TCCAATGCCCTGCTAATCCAGAAATCATTAATGCATGGTTACTATGTCAAAGCATAATA      | 4074 |
| -----                |                                                                  |      |
| DRB5*02:02e1_STR1    | GCTTGTGGCCTGCAGAGATAAGAGAAAGGTTAACTAGTTAAGGGTCTTTGGTTTGAAT       | 4100 |
| DRB5*02:02e1         | GCTTGTGGCCTGCAGAGATAAGAGAAAGGTTAACTAGTTAAGGGTCTTTGGTTTGAAT       | 4104 |
| DRB5*02:03e1         | GCTTGTGGCCTGCAGAGATAAGAGAAAGGTTAACTAGTTAAGGGTCTTTGGTTTGAAT       | 4099 |

|                      |                                                                   |      |
|----------------------|-------------------------------------------------------------------|------|
| DRB5*01:01:01_HGP    | GCTTGTGGCCGTCAGAGATAAGAGAAAGGTTAACTAGTTAAGGGTCCTTTGGTTTGAAT       | 4104 |
| DRB5*01:01:01_STR1   | GCTTGTGGCCGTCAGAGATAAGAGAAAGGTTAACTAGTTAAGGGTCCTTTGGTTTGAAT       | 4100 |
| DRB5*01:01:01v1      | GCTTGTGGCCGTCAGAGATAAGAGAAAGGTTAACTAGTTAAGGGTCCTTTGGTTTGAAT       | 4098 |
| DRB5*01:01:01v1_STR1 | GCTTGTGGCCGTCAGAGATAAGAGAAAGGTTAACTAGTTAAGGGTCCTTTGGTTTGAAT       | 4108 |
| DRB5*01:08Ne1        | GCTTGTGGCCGTCAGAGATAAGAGAAAGGTTAACTAGTTAAGGGTCCTTTGGTTTGAAT       | 4113 |
| DRB5*01:03e1         | GCTTGTGGCCGTCAGAGATAAGAGAAAGGTTAACTAGTTAAGGGTCCTTTGGTTTGAAT       | 4134 |
| DRB5*01:02e1         | GCTTGTGGCCGTCAGAGATAAGAGAAAGGTTAACTAGTTAAGGGTCCTTTGGTTTGAAT       | 4140 |
| DRB5*01:02e1_STR1    | GCTTGTGGCCGTCAGAGATAAGAGAAAGGTTAACTAGTTAAGGGTCCTTTGGTTTGAAT       | 4134 |
| -----                |                                                                   |      |
| DRB5*02:02e1_STR1    | CCTGGAGCAAATTAAGGAAGAGCCACTAAGGCTAATGCAATTACACTGGATCCTGTGACA      | 4160 |
| DRB5*02:02e1         | CCTGGAGCAAATTAAGGAAGAGCCACTAAGGCTAATGCAATTACACTGGATCCTGTGACA      | 4164 |
| DRB5*02:03e1         | CCTGGAGCAAATTAAGGAAGAGCCACTAAGGCTAATGCAATTACACTGGATCCTGTGACA      | 4159 |
| DRB5*01:01:01_HGP    | CCTGGAGCAAATTAAGGAAGAGCCACTAAGGCTAATGCAATTACACTGGATCCTGTGACA      | 4164 |
| DRB5*01:01:01_STR1   | CCTGGAGCAAATTAAGGAAGAGCCACTAAGGCTAATGCAATTACACTGGATCCTGTGACA      | 4160 |
| DRB5*01:01:01v1      | CCTGGAGCAAATTAAGGAAGAGCCACTAAGGCTAATGCAATTACACTGGATCCTGTGACA      | 4158 |
| DRB5*01:01:01v1_STR1 | CCTGGAGCAAATTAAGGAAGAGCCACTAAGGCTAATGCAATTACACTGGATCCTGTGACA      | 4168 |
| DRB5*01:08Ne1        | CCTGGAGCAAATTAAGGAAGAGCCACTAAGGCTAATGCAATTACACTGGATCCTGTGACA      | 4173 |
| DRB5*01:03e1         | CCTGGAGCAAATTAAGGAAGAGCCACTAAGGCTAATGCAATTACACTGGATCCTGTGACA      | 4194 |
| DRB5*01:02e1         | CCTGGAGCAAATTAAGGAAGAGCCACTAAGGCTAATGCAATTACACTGGATCCTGTGACA      | 4200 |
| DRB5*01:02e1_STR1    | CCTGGAGCAAATTAAGGAAGAGCCACTAAGGCTAATGCAATTACACTGGATCCTGTGACA      | 4194 |
| -----                |                                                                   |      |
| DRB5*02:02e1_STR1    | GACATGTCATGCTTCATGGGTCACATGGTCTGTTTCTGCTCCTCTCGCCCTGGTTGGTG       | 4220 |
| DRB5*02:02e1         | GACATGTCATGCTTCATGGGTCACATGGTCTGTTTCTGCTCCTCTCGCCCTGGTTGGTG       | 4224 |
| DRB5*02:03e1         | GACATGTCATGCTTCATGGGTCACATGGTCTGTTTCTGCTCCTCTCGCCCTGGTTGGTG       | 4219 |
| DRB5*01:01:01_HGP    | GACATGTCATGCTTCATGGGTCACATGGTCTGTTTCTGCTCCTCTCGCCCTGGTTGGTG       | 4224 |
| DRB5*01:01:01_STR1   | GACATGTCATGCTTCATGGGTCACATGGTCTGTTTCTGCTCCTCTCGCCCTGGTTGGTG       | 4220 |
| DRB5*01:01:01v1      | GACATGTCATGCTTCATGGGTCACATGGTCTGTTTCTGCTCCTCTCGCCCTGGTTGGTG       | 4218 |
| DRB5*01:01:01v1_STR1 | GACATGTCATGCTTCATGGGTCACATGGTCTGTTTCTGCTCCTCTCGCCCTGGTTGGTG       | 4228 |
| DRB5*01:08Ne1        | GACATGTCATGCTTCATGGGTCACATGGTCTGTTTCTGCTCCTCTCGCCCTGGTTGGTG       | 4233 |
| DRB5*01:03e1         | GACATGTCATGCTTCATGGGTCACATGGTCTGTTTCTGCTCCTCTCGCCCTGGTTGGTG       | 4254 |
| DRB5*01:02e1         | GACATGTCATGCTTCATGGGTCACATGGTCTGTTTCTGCTCCTCTCGCCCTGGTTGGTG       | 4260 |
| DRB5*01:02e1_STR1    | GACATGTCATGCTTCATGGGTCACATGGTCTGTTTCTGCTCCTCTCGCCCTGGTTGGTG       | 4254 |
| -----                |                                                                   |      |
| DRB5*02:02e1_STR1    | TGGGTTGTGGTGTAGAGAAATCTCAGGTGGGAGATCTGGGACTAGGACATTGTGTGGG        | 4280 |
| DRB5*02:02e1         | TGGGTTGTGGTGTAGAGAAATCTCAGGTGGGAGATCTGGGACTAGGACATTGTGTGGG        | 4284 |
| DRB5*02:03e1         | TGGGTTGTGGTGTAGAGAAATCTCAGGTGGGAGATCTGGGACTAGGACATTGTGTGGG        | 4279 |
| DRB5*01:01:01_HGP    | TGGGTTGTGGTGTAGAGAAATCTCAGGTGGGAGATCTGGGACTAGGACATTGTGTGGG        | 4284 |
| DRB5*01:01:01_STR1   | TGGGTTGTGGTGTAGAGAAATCTCAGGTGGGAGATCTGGGACTAGGACATTGTGTGGG        | 4280 |
| DRB5*01:01:01v1      | TGGGTTGTGGTGTAGAGAAATCTCAGGTGGGAGATCTGGGACTAGGACATTGTGTGGG        | 4278 |
| DRB5*01:01:01v1_STR1 | TGGGTTGTGGTGTAGAGAAATCTCAGGTGGGAGATCTGGGACTAGGACATTGTGTGGG        | 4288 |
| DRB5*01:08Ne1        | TGGGTTGTGGTGTAGAGAAATCTCAGGTGGGAGATCTGGGACTAGGACATTGTGTGGG        | 4293 |
| DRB5*01:03e1         | TGGGTTGTGGTGTAGAGAAATCTCAGGTGGGAGATCTGGGACTAGGACATTGTGTGGG        | 4314 |
| DRB5*01:02e1         | TGGGTTGTGGTGTAGAGAAATCTCAGGTGGGAGATCTGGGACTAGGACATTGTGTGGG        | 4320 |
| DRB5*01:02e1_STR1    | TGGGTTGTGGTGTAGAGAAATCTCAGGTGGGAGATCTGGGACTAGGACATTGTGTGGG        | 4314 |
| -----                |                                                                   |      |
| DRB5*02:02e1_STR1    | AGAAATAGATTTGCTTCCATACCTTTTAAAGTGATATATCTTTCCCTTTTTCCCG           | 4340 |
| DRB5*02:02e1         | AGAAATAGATTTGCTTCCATACCTTTTAAAGTGATATATCTTTCCCTTTTTCCCG           | 4344 |
| DRB5*02:03e1         | AGAAATAGATTTGCTTCCATACCTTTTAAAGTGATATATCTTTCCCTTTTTCCCG           | 4339 |
| DRB5*01:01:01_HGP    | AGAAATAGATTTGCTTCCATACCTTTTAAAGTGATATATCTTTCCCTTTTTCCCG           | 4344 |
| DRB5*01:01:01_STR1   | AGAAATAGATTTGCTTCCATACCTTTTAAAGTGATATATCTTTCCCTTTTTCCCG           | 4340 |
| DRB5*01:01:01v1      | AGAAATAGATTTGCTTCCATACCTTTTAAAGTGATATATCTTTCCCTTTTTCCCG           | 4338 |
| DRB5*01:01:01v1_STR1 | AGAAATAGATTTGCTTCCATACCTTTTAAAGTGATATATCTTTCCCTTTTTCCCG           | 4348 |
| DRB5*01:08Ne1        | AGAAATAGATTTGCTTCCATACCTTTTAAAGTGATATATCTTTCCCTTTTTCCCG           | 4353 |
| DRB5*01:03e1         | AGAAATAGATTTGCTTCCATACCTTTTAAAGTGATATATCTTTCCCTTTTTCCCG           | 4374 |
| DRB5*01:02e1         | AGAAATAGATTTGCTTCCATACCTTTTAAAGTGATATATCTTTCCCTTTTTCCCG           | 4380 |
| DRB5*01:02e1_STR1    | AGAAATAGATTTGCTTCCATACCTTTTAAAGTGATATATCTTTCCCTTTTTCCCG           | 4374 |
| -----                |                                                                   |      |
| DRB5*02:02e1_STR1    | TCTGGACTTCACCCAACAG   GTAATACCTTTTAAATCCTCTTTTAGAAACAGATTTCAGTTTT | 4400 |
| DRB5*02:02e1         | TCTGGACTTCACCCAACAG   GTAATACCTTTTAAATCCTCTTTTAGAAACAGATTTCAGTTTT | 4404 |
| DRB5*02:03e1         | TCTGGACTTCACCCAACAG   GTAATACCTTTTAAATCCTCTTTTAGAAACAGATTTCAGTTTT | 4399 |
| DRB5*01:01:01_HGP    | TCTGGACTTCACCCAACAG   GTAATACCTTTTAAATCCTCTTTTAGAAACAGATTTCAGTTTT | 4404 |
| DRB5*01:01:01_STR1   | TCTGGACTTCACCCAACAG   GTAATACCTTTTAAATCCTCTTTTAGAAACAGATTTCAGTTTT | 4400 |
| DRB5*01:01:01v1      | TCTGGACTTCACCCAACAG   GTAATACCTTTTAAATCCTCTTTTAGAAACAGATTTCAGTTTT | 4398 |
| DRB5*01:01:01v1_STR1 | TCTGGACTTCACCCAACAG   GTAATACCTTTTAAATCCTCTTTTAGAAACAGATTTCAGTTTT | 4408 |
| DRB5*01:08Ne1        | TCTGGACTTCACCCAACAG   GTAATACCTTTTAAATCCTCTTTTAGAAACAGATTTCAGTTTT | 4413 |
| DRB5*01:03e1         | TCTGGACTTCACCCAACAG   GTAATACCTTTTAAATCCTCTTTTAGAAACAGATTTCAGTTTT | 4434 |
| DRB5*01:02e1         | TCTGGACTTCACCCAACAG   GTAATACCTTTTAAATCCTCTTTTAGAAACAGATTTCAGTTTT | 4440 |
| DRB5*01:02e1_STR1    | TCTGGACTTCACCCAACAG   GTAATACCTTTTAAATCCTCTTTTAGAAACAGATTTCAGTTTT | 4434 |
| -----                |                                                                   |      |
| DRB5*02:02e1_STR1    | CCTAGAATGATGGCAGAGGTGATAAAGGCATGAGACAGAAATAGCAGGAAAGACTTTGGAT     | 4460 |
| DRB5*02:02e1         | CCTAGAATGATGGCAGAGGTGATAAAGGCATGAGACAGAAATAGCAGGAAAGACTTTGGAT     | 4464 |
| DRB5*02:03e1         | CCTAGAATGATGGCAGAGGTGATAAAGGCATGAGACAGAAATAGCAGGAAAGACTTTGGAT     | 4459 |
| DRB5*01:01:01_HGP    | CCTAGAATGATGGCAGAGGTGATAAAGGCATGAGACAGAAATAGCAGGAAAGACTTTGGAT     | 4464 |
| DRB5*01:01:01_STR1   | CCTAGAATGATGGCAGAGGTGATAAAGGCATGAGACAGAAATAGCAGGAAAGACTTTGGAT     | 4460 |
| DRB5*01:01:01v1      | CCTAGAATGATGGCAGAGGTGATAAAGGCATGAGACAGAAATAGCAGGAAAGACTTTGGAT     | 4458 |
| DRB5*01:01:01v1_STR1 | CCTAGAATGATGGCAGAGGTGATAAAGGCATGAGACAGAAATAGCAGGAAAGACTTTGGAT     | 4468 |
| DRB5*01:08Ne1        | CCTAGAATGATGGCAGAGGTGATAAAGGCATGAGACAGAAATAGCAGGAAAGACTTTGGAT     | 4473 |
| DRB5*01:03e1         | CCTAGAATGATGGCAGAGGTGATAAAGGCATGAGACAGAAATAGCAGGAAAGACTTTGGAT     | 4494 |
| DRB5*01:02e1         | CCTAGAATGATGGCAGAGGTGATAAAGGCATGAGACAGAAATAGCAGGAAAGACTTTGGAT     | 4500 |
| DRB5*01:02e1_STR1    | CCTAGAATGATGGCAGAGGTGATAAAGGCATGAGACAGAAATAGCAGGAAAGACTTTGGAT     | 4494 |
| -----                |                                                                   |      |
| DRB5*02:02e1_STR1    | CCAAATTCCTGATCAGGCAATTTATACCAAACCTCCTCCTCCACTTAGGCCGTGCTC         | 4520 |

|                      |                                                            |      |
|----------------------|------------------------------------------------------------|------|
| DRB5*02:02e1         | CCAAATTCCTGATCAGGCAATTTATACCAAACCTCCCTCTCCACTTAGGCCTGTGCTC | 4524 |
| DRB5*02:03e1         | CCAAATTCCTGATCAGGCAATTTATACCAAACCTCCCTCTCCACTTAGGCCTGTGCTC | 4519 |
| DRB5*01:01:01_HGP    | CCAAATTCCTGATCAGGCAATTTATACCAAACCTCCCTCTCCACTTAGGCCTGTGCTC | 4524 |
| DRB5*01:01:01_STR1   | CCAAATTCCTGATCAGGCAATTTATACCAAACCTCCCTCTCCACTTAGGCCTGTGCTC | 4520 |
| DRB5*01:01:01v1      | CCAAATTCCTGATCAGGCAATTTATACCAAACCTCCCTCTCCACTTAGGCCTGTGCTC | 4518 |
| DRB5*01:01:01v1_STR1 | CCAAATTCCTGATCAGGCAATTTATACCAAACCTCCCTCTCCACTTAGGCCTGTGCTC | 4528 |
| DRB5*01:08Ne1        | CCAAATTCCTGATCAGGCAATTTATACCAAACCTCCCTCTCCACTTAGGCCTGTGCTC | 4533 |
| DRB5*01:03e1         | CCAAATTCCTGATCAGGCAATTTATACCAAACCTCCCTCTCCACTTAGGCCTGTGCTC | 4554 |
| DRB5*01:02e1         | CCAAATTCCTGATCAGGCAATTTATACCAAACCTCCCTCTCCACTTAGGCCTGTGCTC | 4560 |
| DRB5*01:02e1_STR1    | CCAAATTCCTGATCAGGCAATTTATACCAAACCTCCCTCTCCACTTAGGCCTGTGCTC | 4554 |

|                      |                                                               |      |
|----------------------|---------------------------------------------------------------|------|
| DRB5*02:02e1_STR1    | TGCAGGAGTATTGGTTCAGGGAGACTTAGGAAC TTGTTTTCTTCTTCCCTGCAGTGCTCT | 4580 |
| DRB5*02:02e1         | TGCAGGAGTATTGGTTCAGGGAGACTTAGGAAC TTGTTTTCTTCTTCCCTGCAGTGCTCT | 4584 |
| DRB5*02:03e1         | TGCAGGAGTATTGGTTCAGGGAGACTTAGGAAC TTGTTTTCTTCTTCCCTGCAGTGCTCT | 4579 |
| DRB5*01:01:01_HGP    | TGCAGGAGTATTGGTTCAGGGAGACTTAGGAAC TTGTTTTCTTCTTCCCTGCAGTGCTCT | 4584 |
| DRB5*01:01:01_STR1   | TGCAGGAGTATTGGTTCAGGGAGACTTAGGAAC TTGTTTTCTTCTTCCCTGCAGTGCTCT | 4580 |
| DRB5*01:01:01v1      | TGCAGGAGTATTGGTTCAGGGAGACTTAGGAAC TTGTTTTCTTCTTCCCTGCAGTGCTCT | 4578 |
| DRB5*01:01:01v1_STR1 | TGCAGGAGTATTGGTTCAGGGAGACTTAGGAAC TTGTTTTCTTCTTCCCTGCAGTGCTCT | 4588 |
| DRB5*01:08Ne1        | TGCAGGAGTATTGGTTCAGGGAGACTTAGGAAC TTGTTTTCTTCTTCCCTGCAGTGCTCT | 4593 |
| DRB5*01:03e1         | TGCAGGAGTATTGGTTCAGGGAGACTTAGGAAC TTGTTTTCTTCTTCCCTGCAGTGCTCT | 4614 |
| DRB5*01:02e1         | TGCAGGAGTATTGGTTCAGGGAGACTTAGGAAC TTGTTTTCTTCTTCCCTGCAGTGCTCT | 4620 |
| DRB5*01:02e1_STR1    | TGCAGGAGTATTGGTTCAGGGAGACTTAGGAAC TTGTTTTCTTCTTCCCTGCAGTGCTCT | 4614 |

|                      |                                                               |      |
|----------------------|---------------------------------------------------------------|------|
| DRB5*02:02e1_STR1    | CATCTGAGTCCTTGAAAGAGAGGAAAAGAAGCTGTTAGTGGAAACCAGGCTGAAAAACAAC | 4640 |
| DRB5*02:02e1         | CATCTGAGTCCTTGAAAGAGAGGAAAAGAAGCTGTTAGTGGAAACCAGGCTGAAAAACAAC | 4644 |
| DRB5*02:03e1         | CATCTGAGTCCTTGAAAGAGAGGAAAAGAAGCTGTTAGTGGAAACCAGGCTGAAAAACAAC | 4639 |
| DRB5*01:01:01_HGP    | CATCTGAGTCCTTGAAAGAGAGGAAAAGAAGCTGTTAGTGGAAACCAGGCTGAAAAACAAC | 4644 |
| DRB5*01:01:01_STR1   | CATCTGAGTCCTTGAAAGAGAGGAAAAGAAGCTGTTAGTGGAAACCAGGCTGAAAAACAAC | 4640 |
| DRB5*01:01:01v1      | CATCTGAGTCCTTGAAAGAGAGGAAAAGAAGCTGTTAGTGGAAACCAGGCTGAAAAACAAC | 4638 |
| DRB5*01:01:01v1_STR1 | CATCTGAGTCCTTGAAAGAGAGGAAAAGAAGCTGTTAGTGGAAACCAGGCTGAAAAACAAC | 4648 |
| DRB5*01:08Ne1        | CATCTGAGTCCTTGAAAGAGAGGAAAAGAAGCTGTTAGTGGAAACCAGGCTGAAAAACAAC | 4653 |
| DRB5*01:03e1         | CATCTGAGTCCTTGAAAGAGAGGAAAAGAAGCTGTTAGTGGAAACCAGGCTGAAAAACAAC | 4674 |
| DRB5*01:02e1         | CATCTGAGTCCTTGAAAGAGAGGAAAAGAAGCTGTTAGTGGAAACCAGGCTGAAAAACAAC | 4680 |
| DRB5*01:02e1_STR1    | CATCTGAGTCCTTGAAAGAGAGGAAAAGAAGCTGTTAGTGGAAACCAGGCTGAAAAACAAC | 4674 |

|                      |                     |      |
|----------------------|---------------------|------|
| DRB5*02:02e1_STR1    | ACTTTCCTCTCTCTCTGCA | 4659 |
| DRB5*02:02e1         | ACTTTCCTCTCTCTCTGCA | 4663 |
| DRB5*02:03e1         | ACTTTCCTCTCTCTCTGCA | 4658 |
| DRB5*01:01:01_HGP    | ACTTTCCTCTCTCTCTGCA | 4663 |
| DRB5*01:01:01_STR1   | ACTTTCCTCTCTCTCTGCA | 4659 |
| DRB5*01:01:01v1      | ACTTTCCTCTCTCTCTGCA | 4657 |
| DRB5*01:01:01v1_STR1 | ACTTTCCTCTCTCTCTGCA | 4667 |
| DRB5*01:08Ne1        | ACTTTCCTCTCTCTCTGCA | 4672 |
| DRB5*01:03e1         | ACTTTCCTCTCTCTCTGCA | 4693 |
| DRB5*01:02e1         | ACTTTCCTCTCTCTCTGCA | 4699 |
| DRB5*01:02e1_STR1    | ACTTTCCTCTCTCTCTGCA | 4693 |
