# Supplementary material
Source: PubMed Central journal article supplement (PMC6622178)

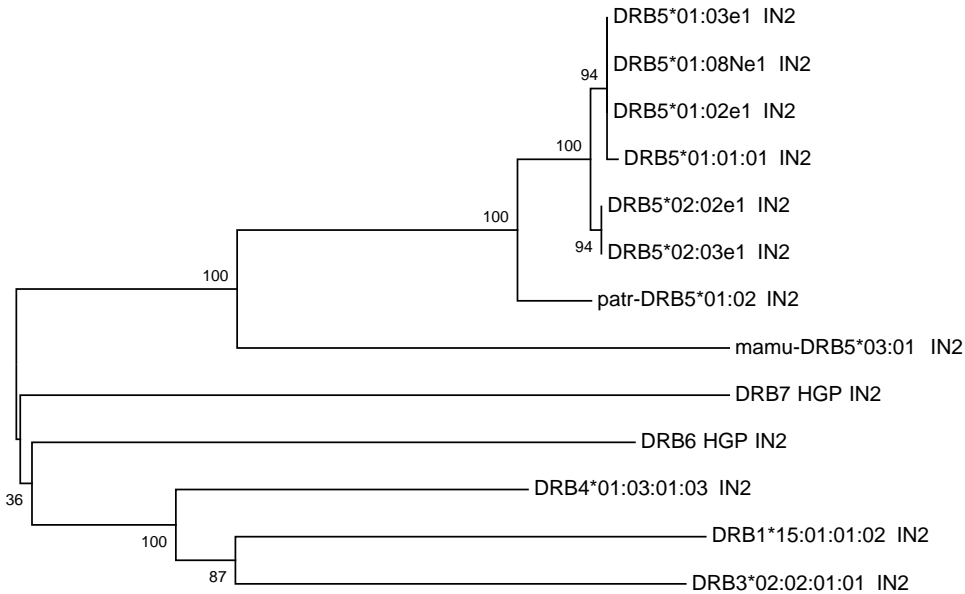

0.010

Supplement: NIHMS1526830-supplement-1.pdf [file NIHMS1526830-supplement-1.pdf]
